# Supplementary material for: Targeting the Alternative Vitamin E Metabolite Binding Site Enables Noncanonical PPARγ Modulation
Source: PubMed Central journal article supplement — J Am Chem Soc. 2023 Jun 29;145(27):14802–10. doi: 10.1021/jacs.3c03417 (PMC10347545; doi:10.1021/jacs.3c03417), 2023-06-29
Supplement: ja3c03417_si_001.pdf [file ja3c03417_si_001.pdf]

## Supporting Information

### Targeting the Alternative Vitamin E Metabolite Binding Site Enables Noncanonical PPAR $\gamma$ Modulation

Silvia Arifi<sup>1</sup>, Julian A. Marschner<sup>2</sup>, Julius Pollinger<sup>1</sup>, Laura Isigkeit<sup>1</sup>, Pascal Heitel<sup>1</sup>, Astrid Kaiser<sup>1</sup>, Lennart Obeser<sup>2</sup>, Georg Höfner<sup>2</sup>, Ewgenij Proschak<sup>1,3</sup>, Stefan Knapp<sup>1,4</sup>, Apirat Chaikuad<sup>1,4</sup>, Jan Heering<sup>3</sup>, Daniel Merk<sup>1,2\*</sup>

<sup>1</sup> Institute of Pharmaceutical Chemistry, Goethe University Frankfurt, D-60438 Frankfurt, Germany

<sup>2</sup> Department of Pharmacy, Ludwig-Maximilians-Universität München, D-81377 Munich, Germany

<sup>3</sup> Fraunhofer Institute for Translational Medicine and Pharmacology ITMP, D-60596 Frankfurt, Germany

<sup>4</sup> Structural Genomics Consortium, BMLS, Goethe University Frankfurt, D-60438 Frankfurt, Germany

\* daniel.merk@cup.lmu.de

#### Table of Contents

|                                                   |     |
|---------------------------------------------------|-----|
| Figures S1-S13 .....                              | S2  |
| Tables S1-S2 .....                                | S12 |
| Synthesis of <b>2</b> .....                       | S19 |
| Methods .....                                     | S20 |
| NMR and HPLC data for <b>1</b> and <b>2</b> ..... | S33 |
| Western Blots .....                               | S37 |
| Supplementary References .....                    | S38 |

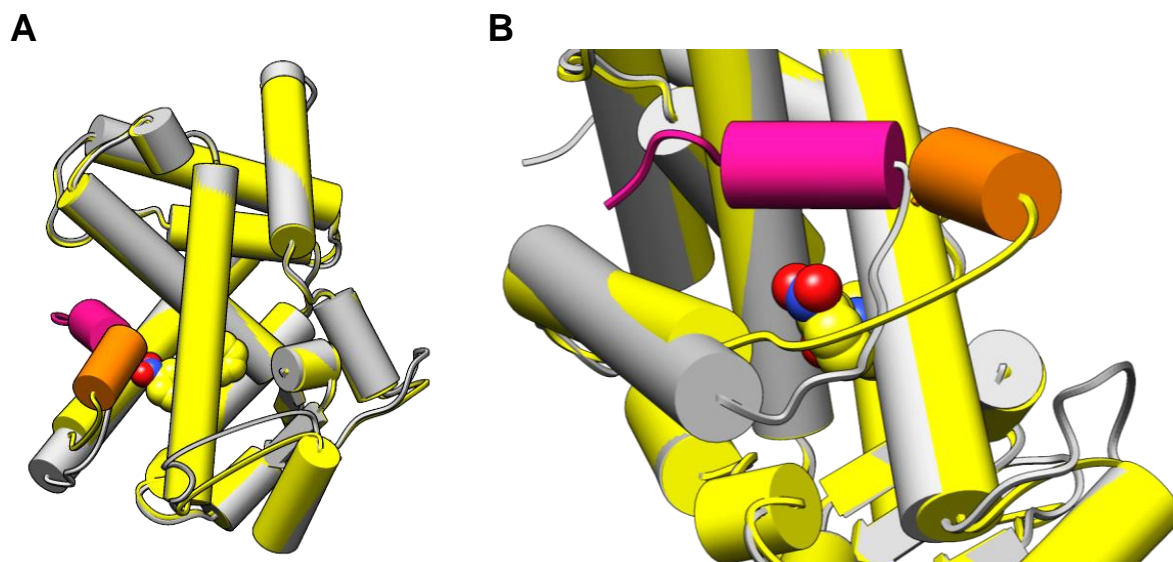

**Figure S1.** Structural comparison of the PPAR $\gamma$  LBD in complex with the agonist rosiglitazone (pdb ID: 7awc; protein grey, helix 12 magenta, ligand not shown) or the irreversible antagonist GW9662 (pdb ID: 3b0r, protein yellow, helix 12 orange, ligand yellow). The GW9662-bound PPAR $\gamma$  LBD conformation differs from the agonist bound state and reveals a shifted position of helix 12 which is due to a lack of helix 12 stabilization by the antagonist. However, GW9662 does not extend to or interfere with the active position of helix 12 indicating that activation via alternative mechanisms is not blocked by antagonist.

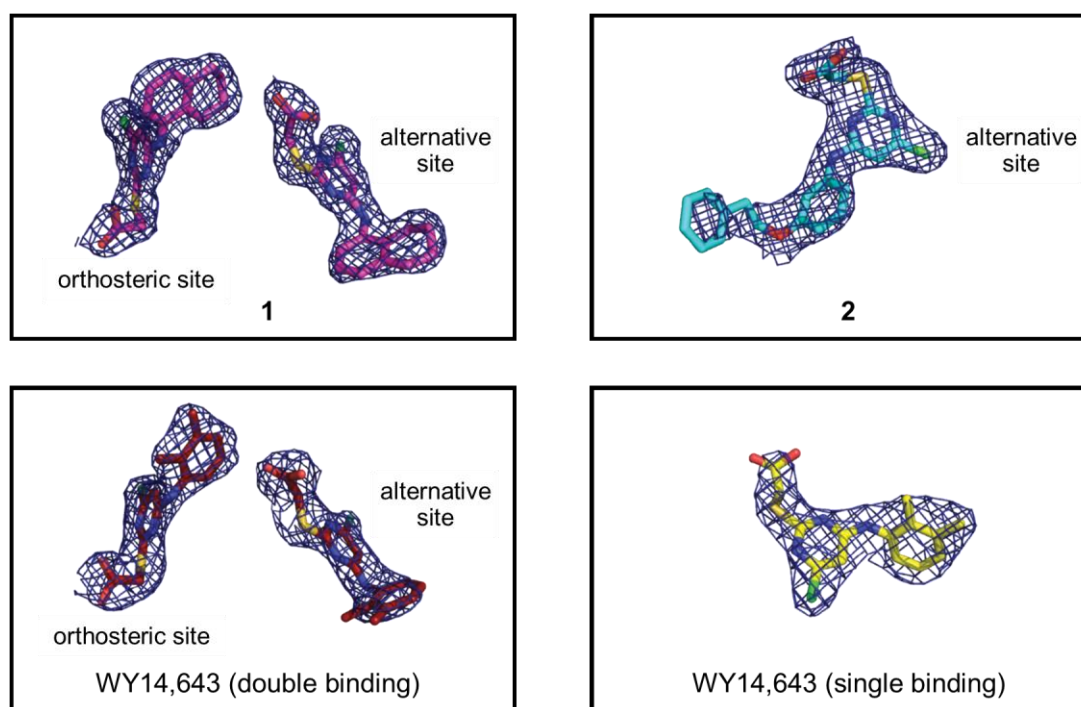

**Figure S2.** 2Fo-Fc electron density maps contoured at  $1\sigma$  for **1** (pdb ID: 8aty), **2** (pdb ID: 8atz), and WY14,643 (pdb IDs: 8cpi, 8cph) bound to the PPAR $\gamma$ -LBD.

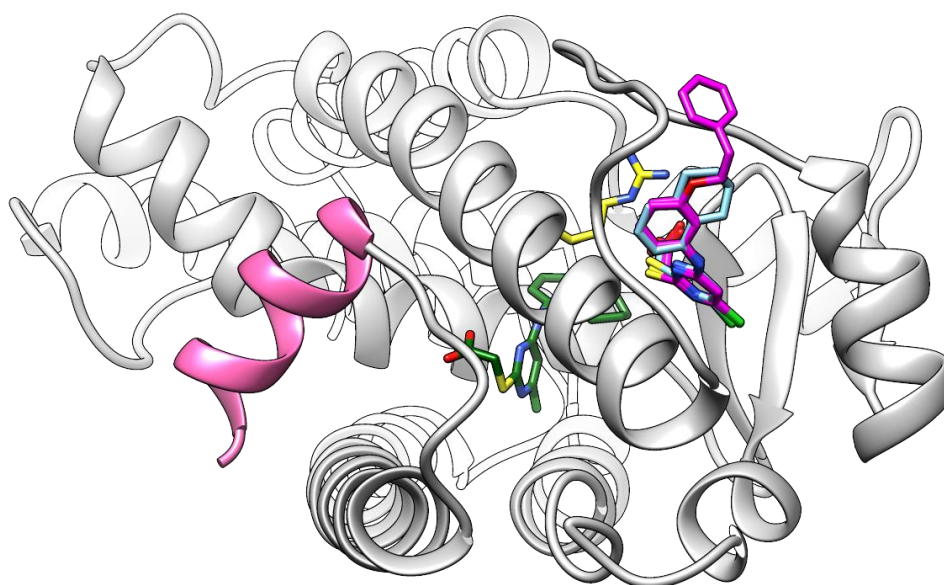

**Figure S3.** The PPAR $\gamma$ -1 complex (pdb ID: 8aty; orthosteric site 1 - green, alternative site 1 - blue) indicated an opportunity to obtain selective binders of the alternative site by extension from the solvent exposed tetrahydronaphthalene motif of 1. Compound 2 was designed based on this observation. Docking of 2 (magenta) into the alternative binding site of 1 supported this design hypothesis.

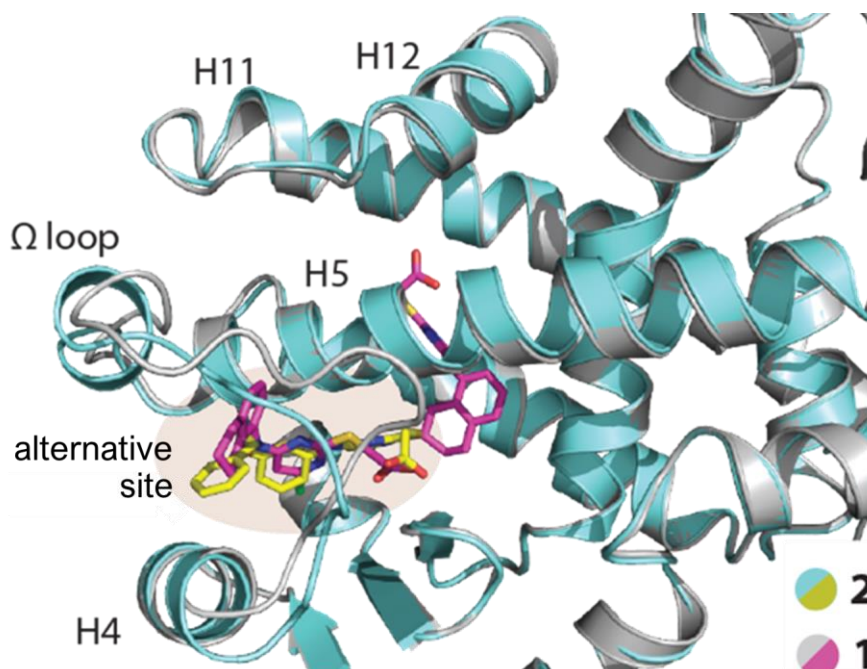

**Figure S4.** Superposition of the PPAR $\gamma$  LBD co-crystal structures in complex with 1 (magenta, pdb ID: 8aty) and 2 (yellow, pdb ID: 8atz) revealed highly similar active conformations but selective alternative site binding of 2.

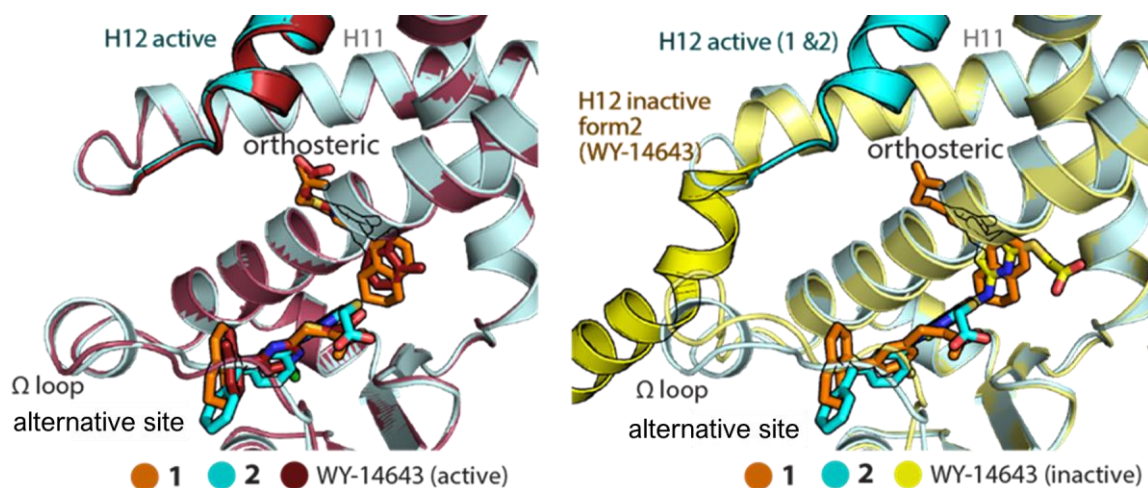

**Figure S5.** WY14,643 exhibits two diverse modes of binding to PPAR $\gamma$ . Double binding of WY14,643 to the orthosteric and alternative sites resembled the binding of **1** and induced an active conformation. Single binding of WY14,643, in contrast was observed similar to the binding of MRL-871 between the orthosteric and alternative sites in an inactive PPAR $\gamma$  conformation. PPAR $\gamma$  LBD bound to **1** (orange, pdb ID: 8aty) and **2** (blue, pdb ID: 8atz) for comparison.

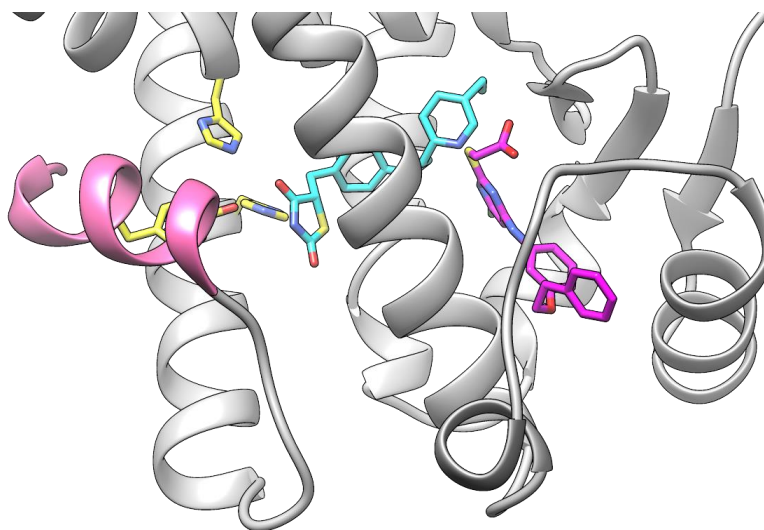

**Figure S6.** Molecular modeling supported simultaneous binding of pioglitazone (cyan) and **2** (magenta) to the PPAR $\gamma$  LBD. Pioglitazone was docked into the unoccupied orthosteric site of the PPAR $\gamma$  LBD bound to **2** (pdb ID: 8atz).

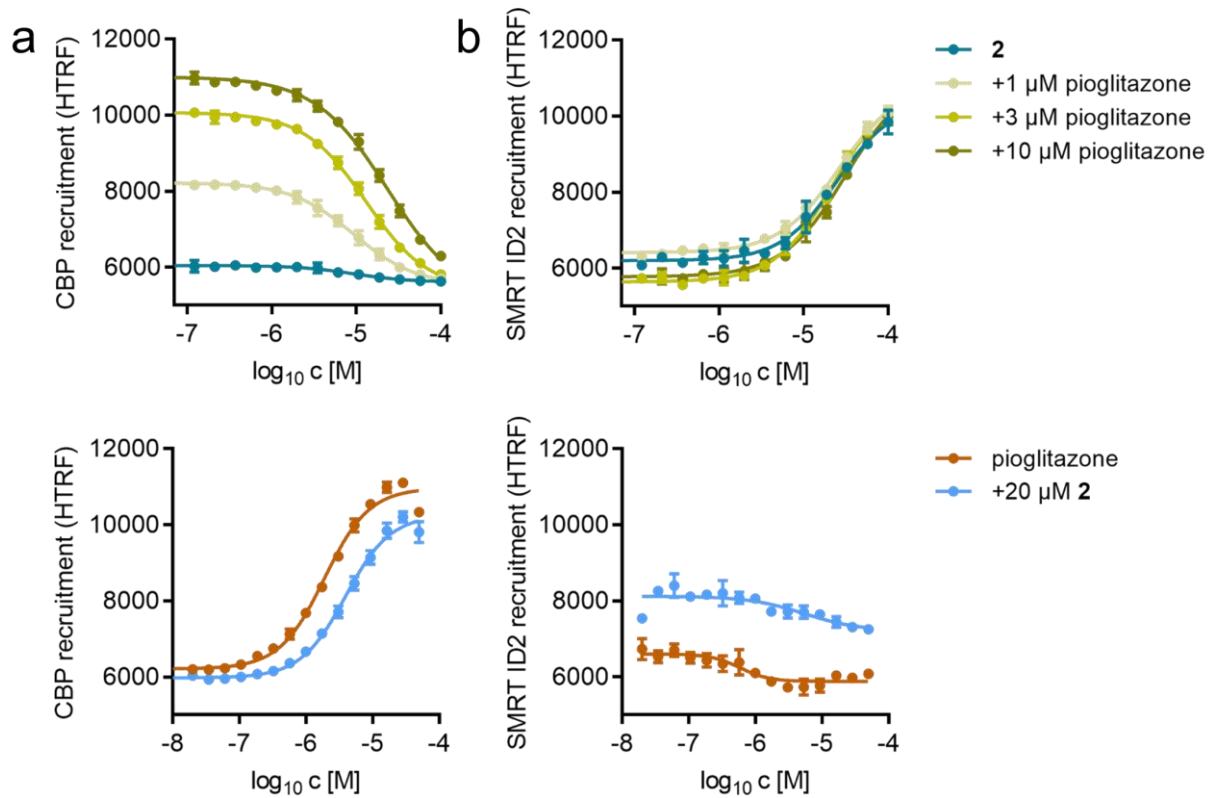

**Figure S7.** **2** dose-dependently modulates recruitment of co-regulators CBP (a) and SMRT-ID2 (b). Pioglitazone-stimulated recruitment of CBP was diminished by **2** in a dose-dependent manner, whereas **2** promoted recruitment of SMRT-ID2. 12 nM of biotin-labeled CBP or SMRT-ID2 peptide were coupled to 12 nM Tb-SA, and presented with sGFP-PPAR $\gamma$  LBD at either 100 nM (for CBP) or 24 nM (for SMRT-ID2). Data are the mean $\pm$ SD HTRF; N=3.

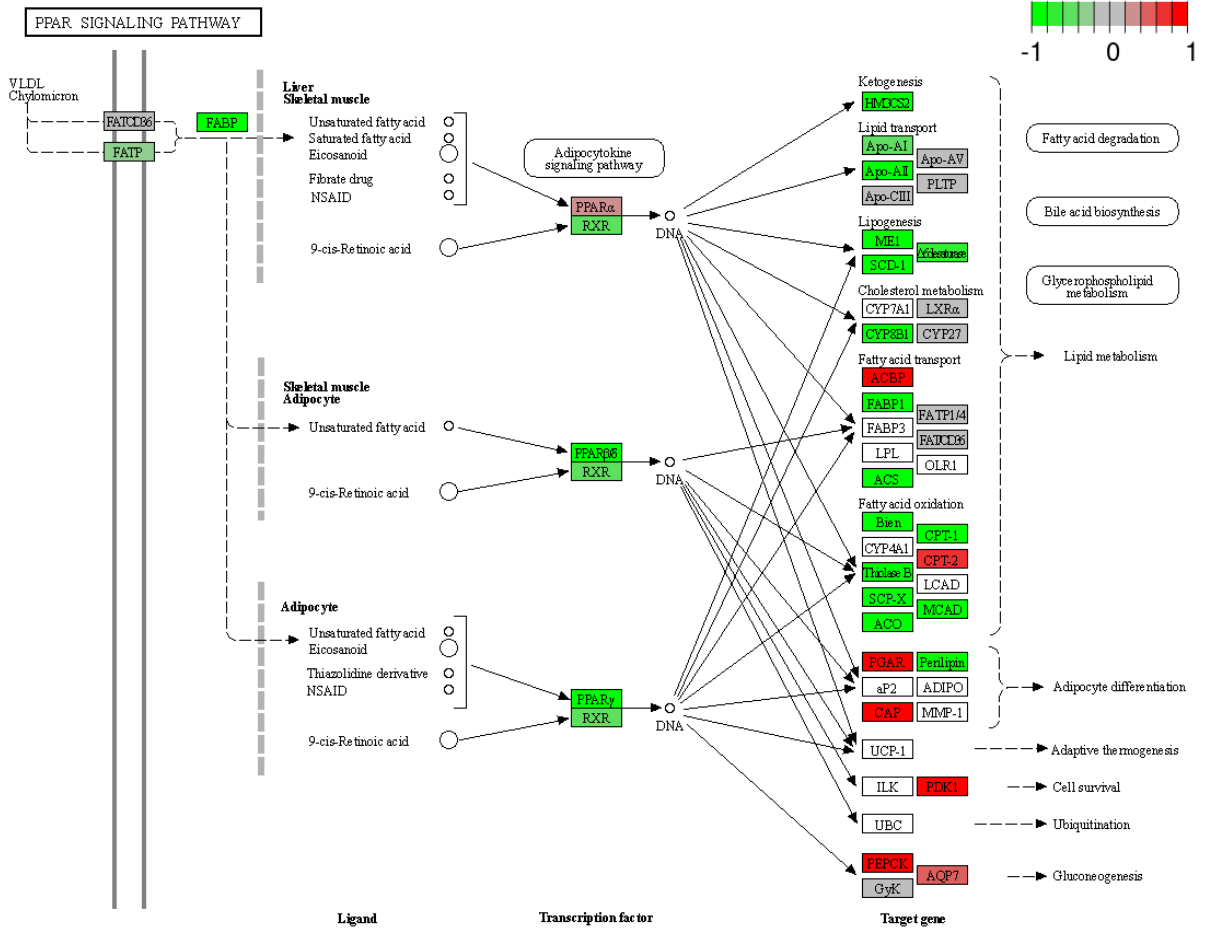

**Figure S8.** Effects of **2** on PPAR signaling in HepG2 cells. Colors indicate differential regulation as  $\log_2(\text{fold change})$  normalized to the range -1 – 1.



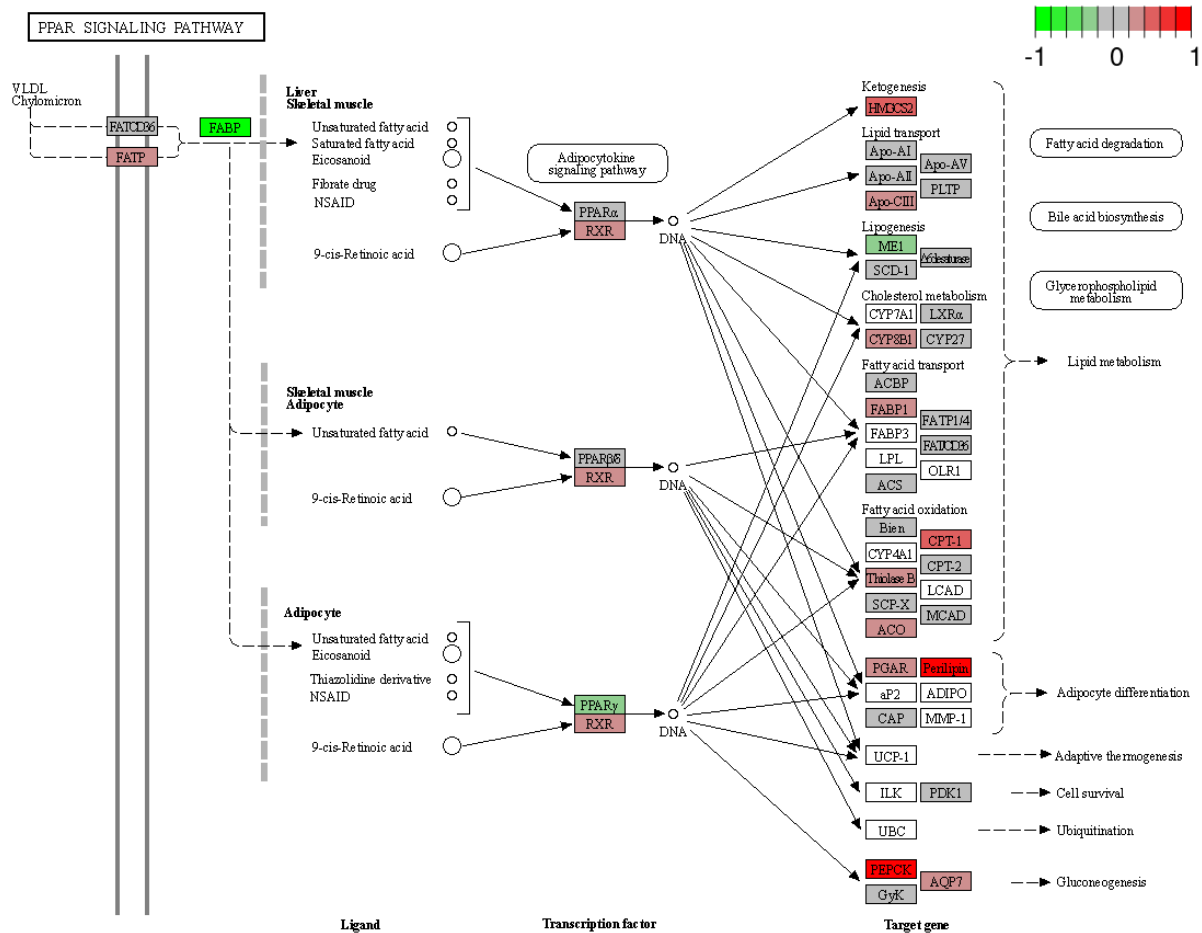

**Figure S9.** Effects of pioglitazone on PPAR signaling in HepG2 cells<sup>1</sup>. Colors indicate differential regulation as  $\log_2(\text{fold change})$  normalized to the range -1 – 1.

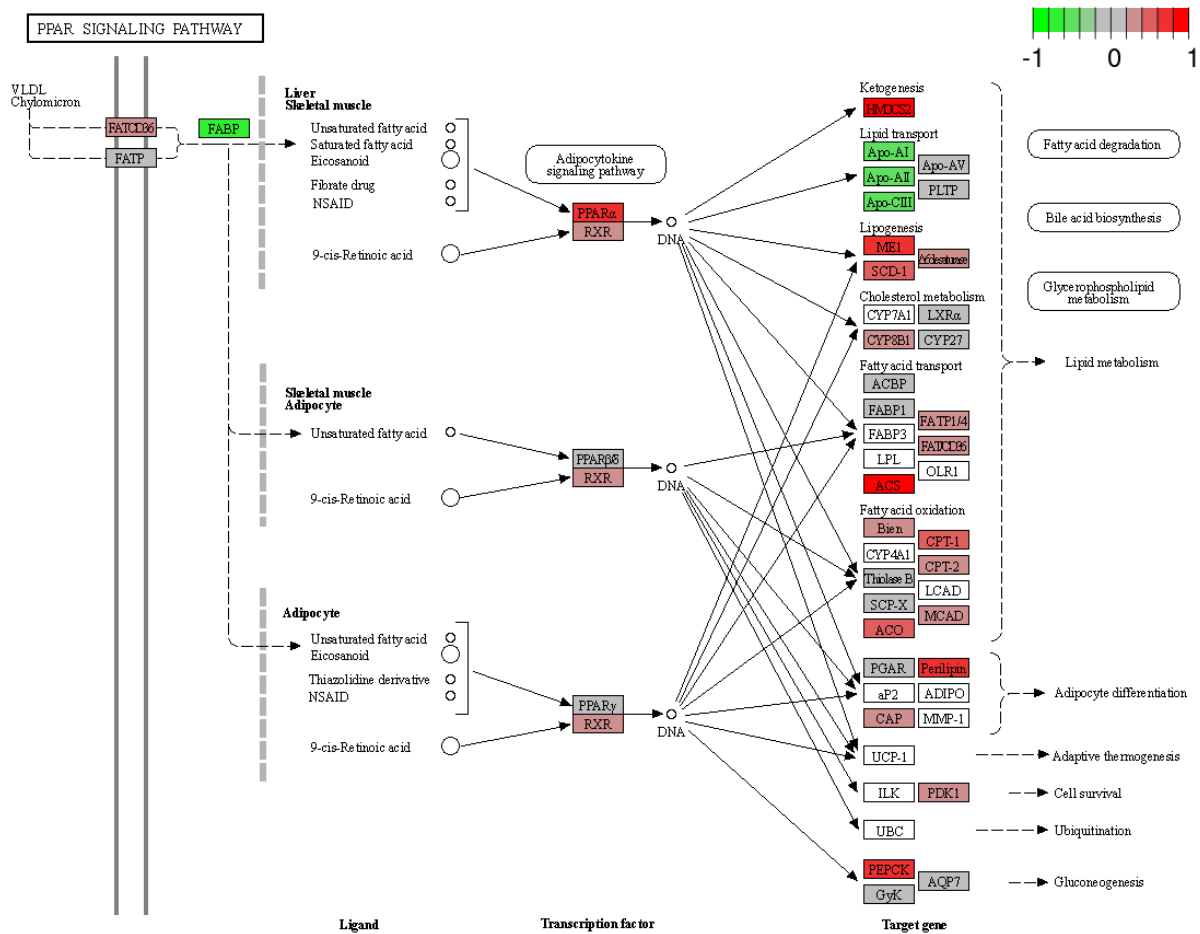

**Figure S10.** Effects of garcinoic acid on PPAR signaling in HepG2 cells<sup>1</sup>. Colors indicate differential regulation as  $\log_2(\text{fold change})$  normalized to the range -1 – 1.



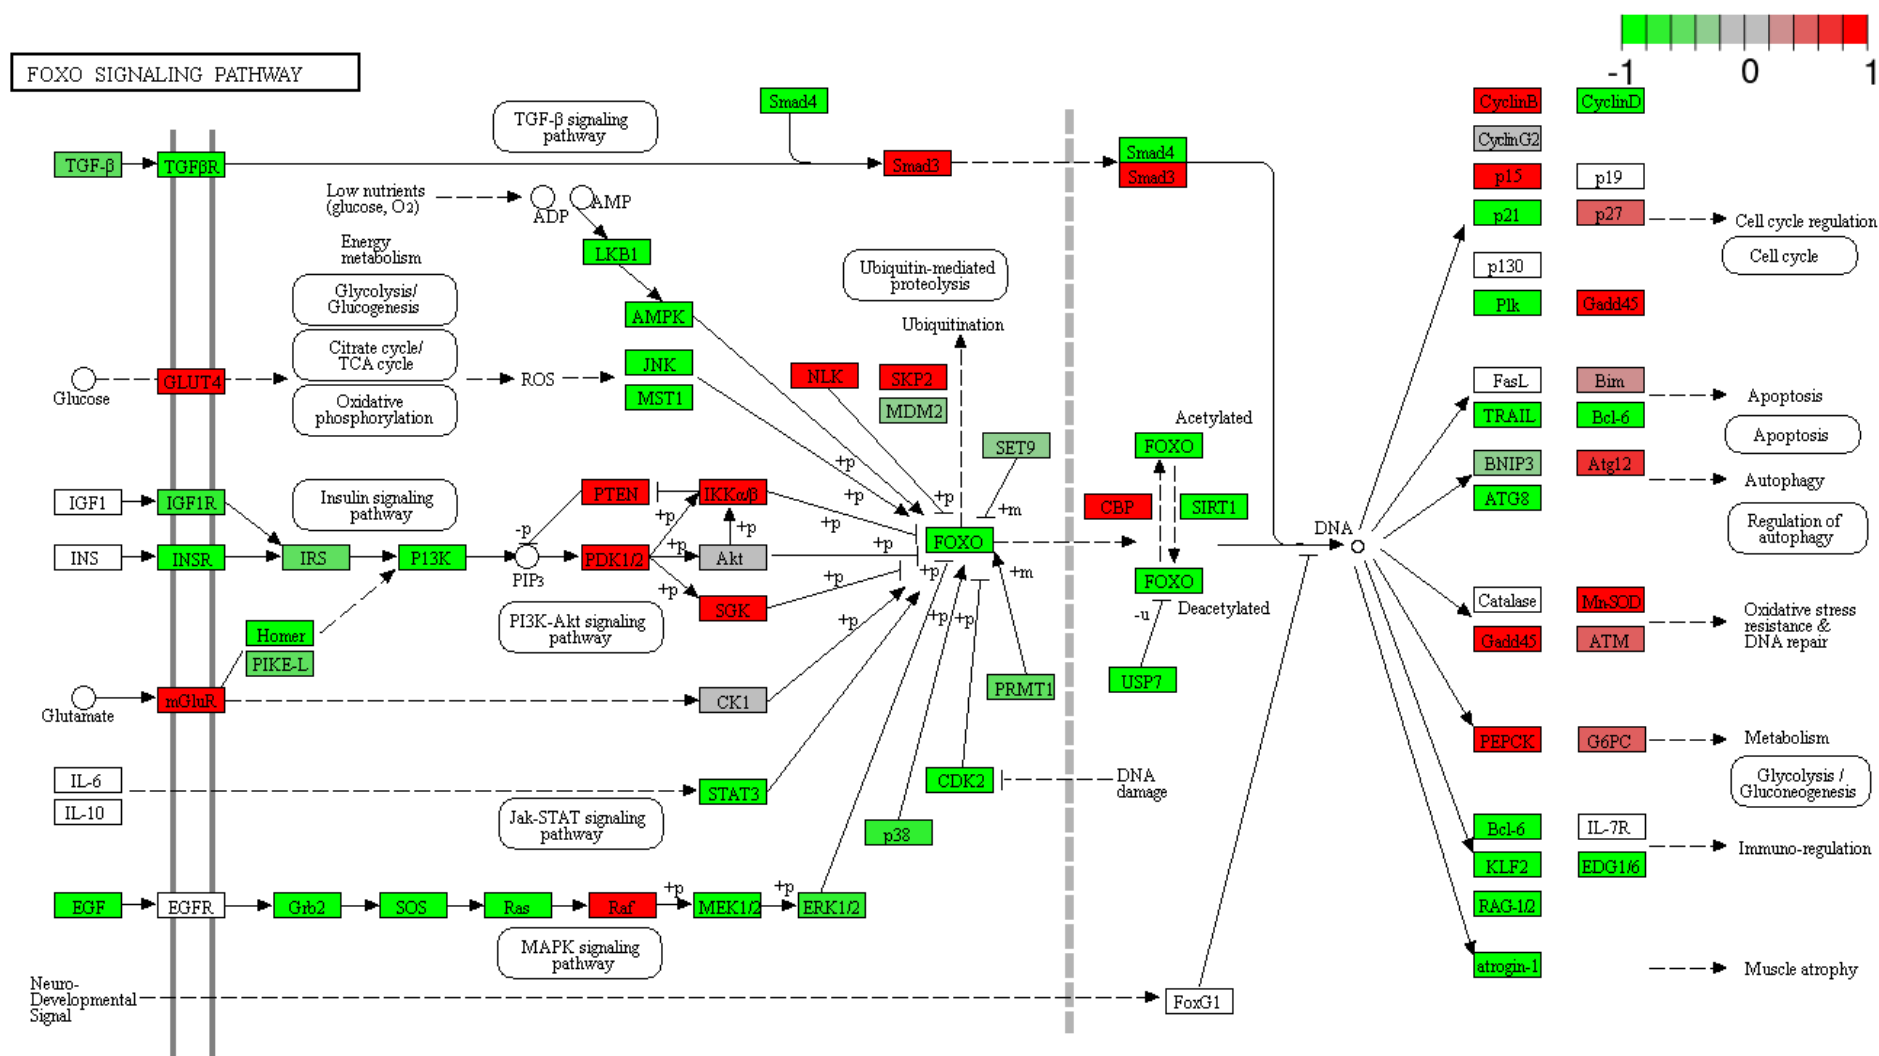

**Figure S11.** Effects of **2** on FOXO signaling in HepG2 cells. Colors indicate differential regulation as log<sub>2</sub>(fold change) normalized to the range -1 – 1.

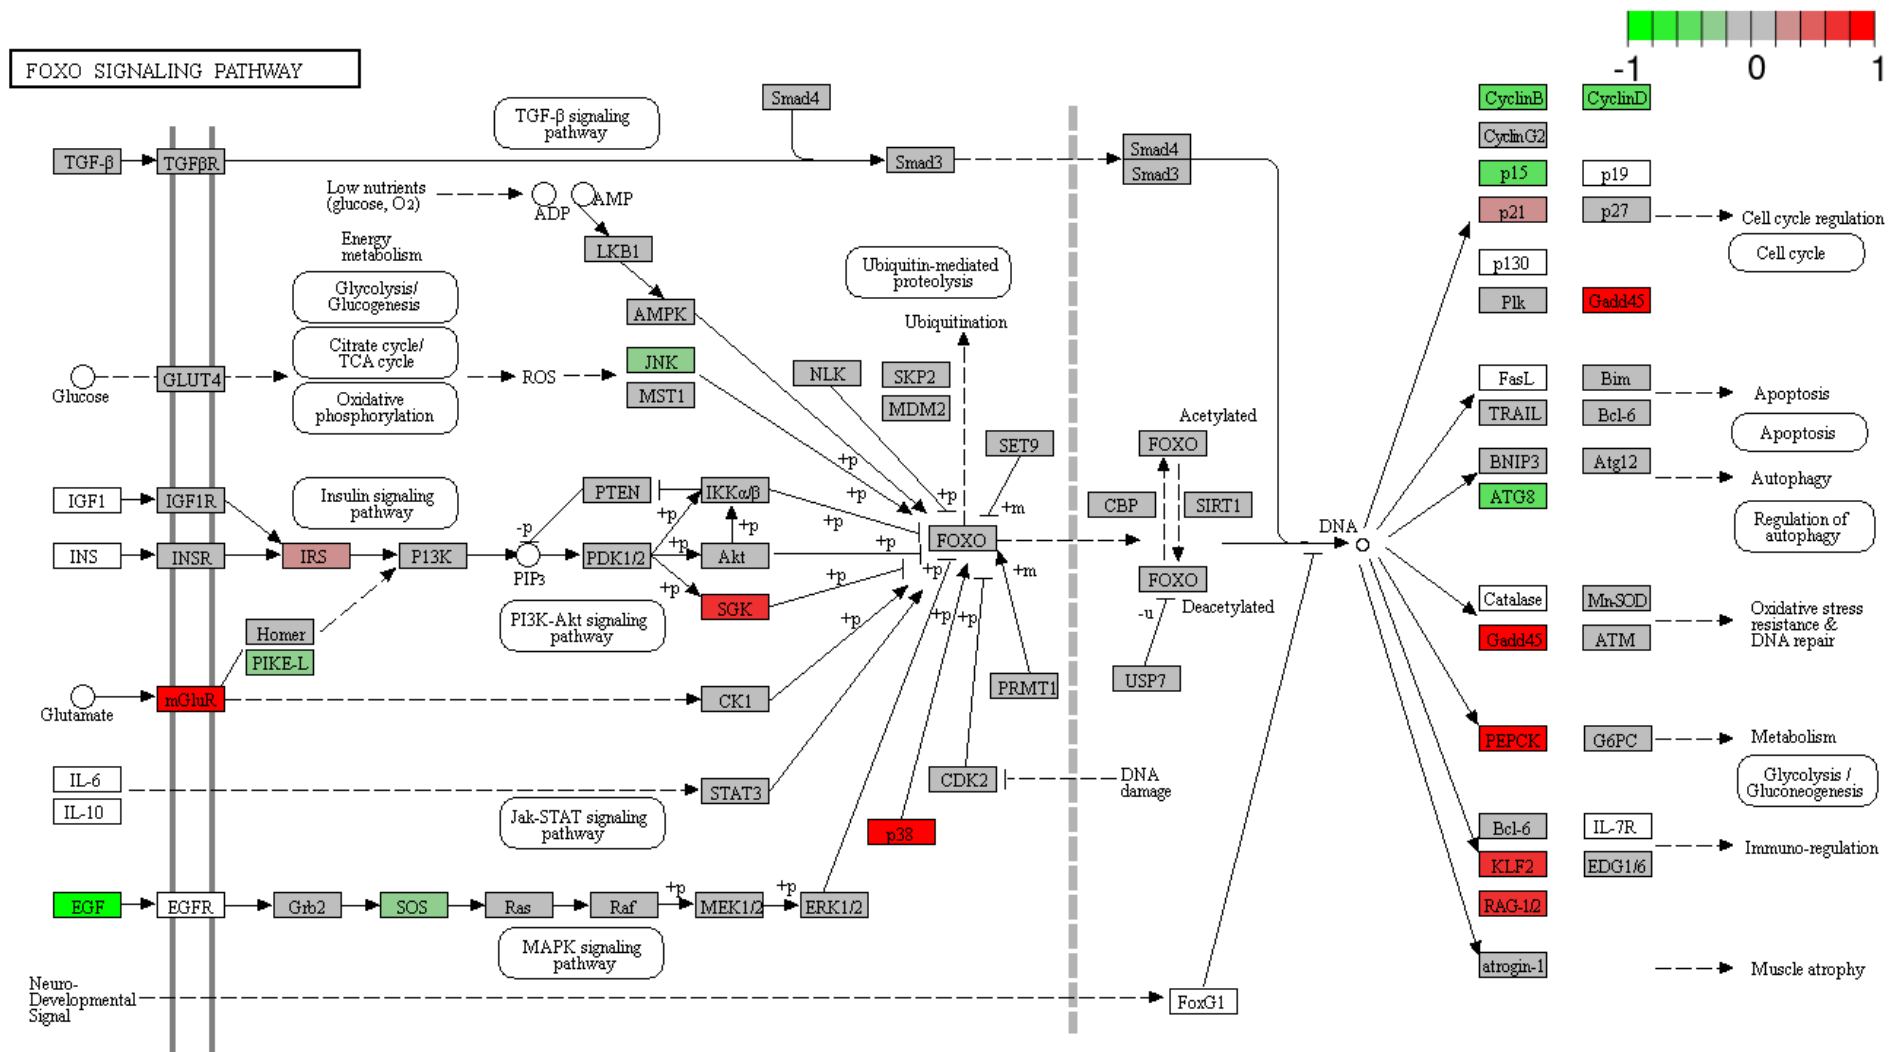

**Figure S12.** Effects of pioglitazone on FOXO signaling in HepG2 cells<sup>1</sup>. Colors indicate differential regulation as  $\log_2(\text{fold change})$  normalized to the range -1 – 1.

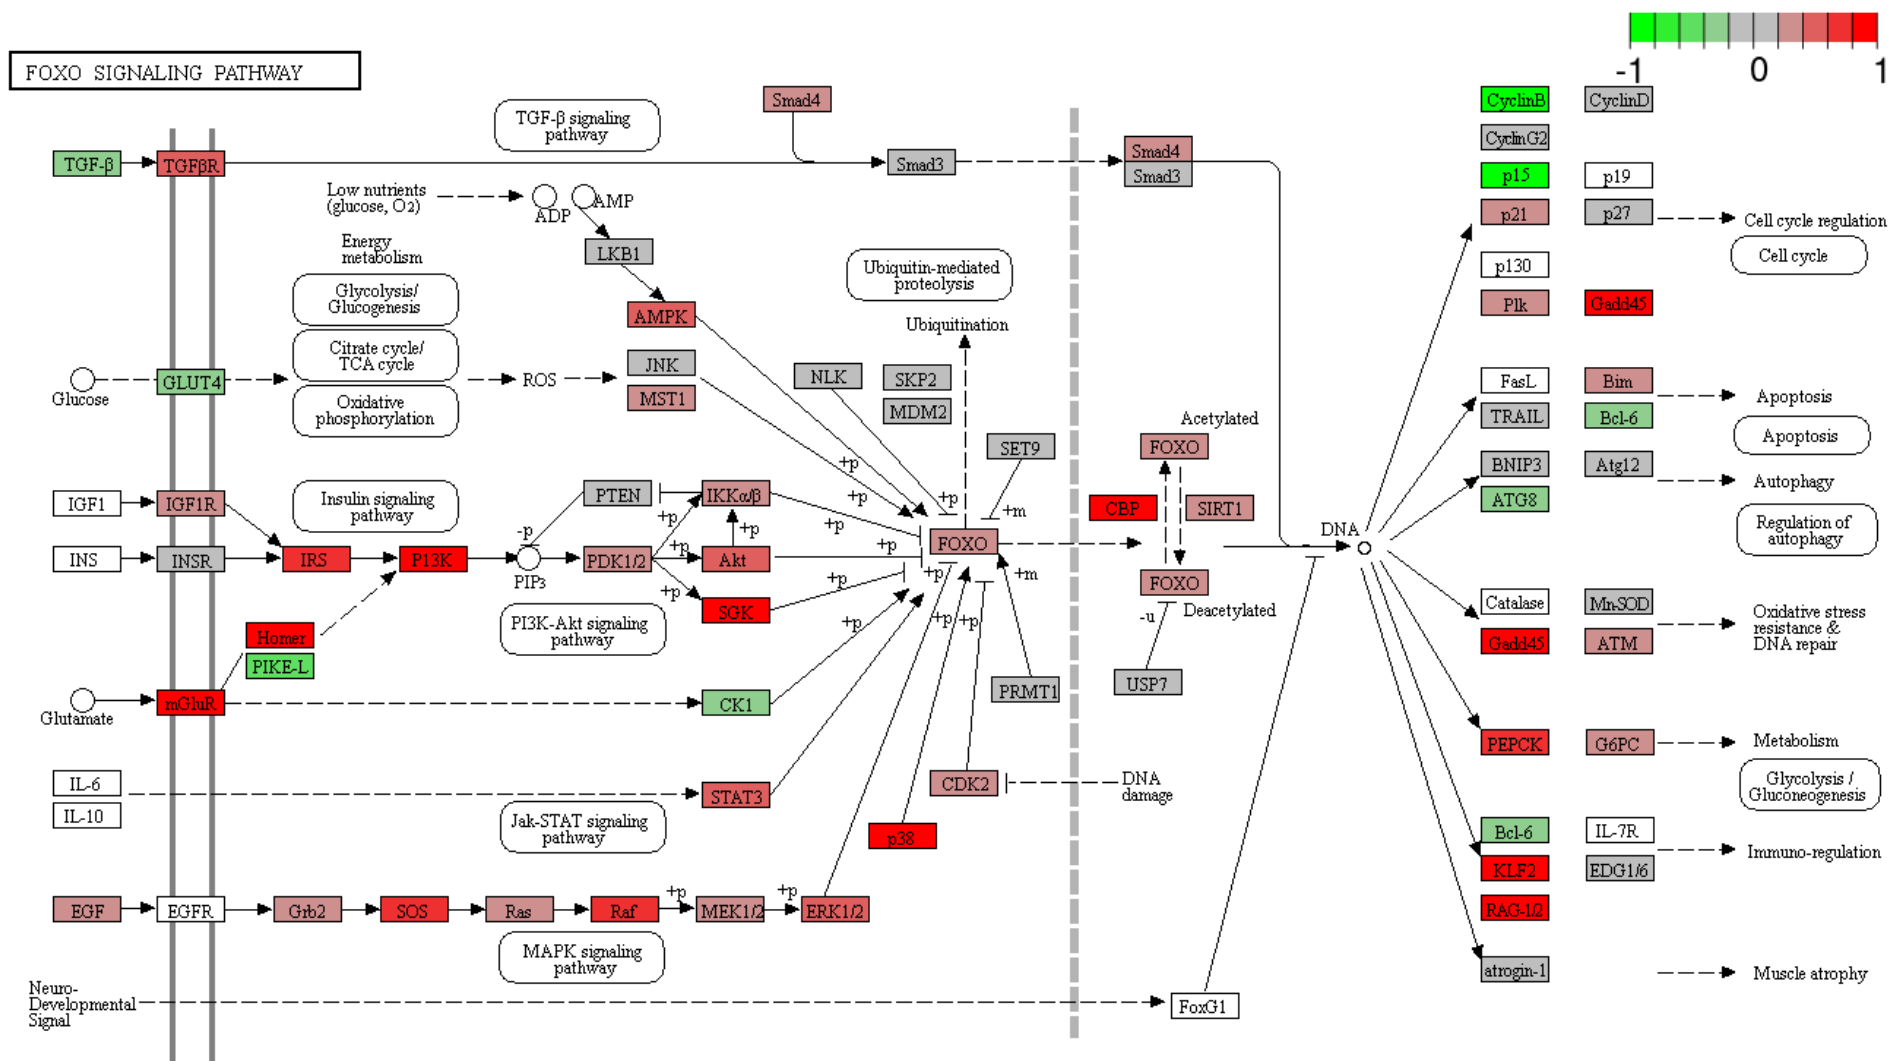

**Figure S13.** Effects of garcinoic acid on FOXO signaling in HepG2 cells<sup>1</sup>. Colors indicate differential regulation as  $\log_2(\text{fold change})$  normalized to the range -1 – 1.

**Table S1.** Provided as supplementary file (xls) containing statistically significant ( $p$ -value < 0.05) effects of **2** on gene expression in HepG2 cells. Only effects with  $|\log_2(\text{fold change})| > 1$  are shown.

**Table S2.** Genes that were regulated by **2**, pioglitazone or GA comprising an experimentally confirmed or predicted PPAR response element. Genes are listed in alphabetical order. Data from <sup>2</sup>.

| gene name | status | log <sub>2</sub> (fold change) |        |        |
|-----------|--------|--------------------------------|--------|--------|
|           |        | 2                              | PIO    | GA     |
| A1CF      | pred.  |                                |        | 0.291  |
| A2M       | pred.  | -2.312                         |        | 0.661  |
| AACS      | pred.  |                                |        | 0.241  |
| ABCA1     | pred.  |                                |        | 0.248  |
| ABCB10    | pred.  |                                |        | 0.544  |
| ABCB7     | pred.  |                                |        | 0.300  |
| ABCC1     | pred.  |                                | 0.191  | 0.362  |
| ABCC3     | pred.  |                                | 0.355  | 0.390  |
| ABCC4     | pred.  |                                |        | 0.682  |
| ABCD3     | pred.  |                                |        | 0.350  |
| ABCG2     | pred.  |                                |        | 0.582  |
| ABCG4     | pred.  | -8.297                         |        |        |
| ABHD3     | pred.  |                                | 0.192  | 0.192  |
| ABHD5     | pred.  |                                | -0.344 |        |
| ACAA2     | pred.  |                                |        | 0.235  |
| ACACB     | pred.  |                                |        | 0.456  |
| ACADM     | pred.  |                                |        | 0.325  |
| ACAP3     | pred.  |                                |        | -0.328 |
| ACAT1     | pred.  |                                |        | 0.320  |
| ACKR2     | pred.  | -7.018                         |        |        |
| ACLY      | pred.  | -1.794                         |        | 0.474  |
| ACO1      | pred.  |                                |        | 0.467  |
| ACO2      | pred.  |                                |        | 0.533  |
| ACOT1     | pred.  |                                |        | 0.323  |
| ACOT2     | pred.  |                                | 0.269  | 0.223  |
| ACOX1     | pred.  |                                | 0.150  | 0.291  |
| ACSL1     | pred.  |                                |        | 0.578  |
| ACSL3     | pred.  |                                |        | 0.369  |
| ACSS2     | pred.  |                                |        | 0.194  |
| ACTB      | pred.  | -1.105                         |        |        |
| ACYP2     | pred.  |                                |        | -0.289 |
| ADAMTSL4  | pred.  |                                | 0.283  | 0.300  |
| ADAP2     | pred.  |                                |        | 0.486  |
| ADCK2     | pred.  |                                |        | 0.368  |
| ADH4      | pred.  |                                |        | -0.367 |
| ADIPOR2   | pred.  |                                |        | 0.382  |
| AFAP1     | pred.  |                                |        | 0.455  |
| AFF4      | pred.  |                                |        | 0.487  |
| AFG3L2    | pred.  |                                |        | 0.629  |
| AFP       | pred.  | -1.921                         |        |        |
| AGL       | pred.  |                                |        | 0.332  |
| AGPAT2    | pred.  |                                | 0.527  | 0.400  |
| AIF1L     | pred.  |                                |        | 0.186  |
| AK3       | pred.  |                                |        | 0.296  |
| AKAP1     | pred.  |                                |        | 0.371  |
| ALAS1     | pred.  |                                |        | 0.434  |
| ALDH2     | pred.  |                                |        | -0.305 |
| ALDH3A1   | pred.  |                                |        | 0.530  |
| ALDH9A1   | pred.  | -7.776                         |        | 0.282  |

| gene name | status | log <sub>2</sub> (fold change) |        |        |
|-----------|--------|--------------------------------|--------|--------|
|           |        | 2                              | PIO    | GA     |
| ALG9      | pred.  |                                | -0.228 |        |
| ALS2      | pred.  |                                |        | 0.391  |
| AMMECR1   | pred.  |                                |        | 0.466  |
| AMOT      | pred.  |                                |        | 0.801  |
| ANAPC13   | pred.  | -7.227                         |        |        |
| ANGPT2    | pred.  |                                |        | -1.618 |
| ANKRD17   | pred.  |                                |        | 0.544  |
| ANKRD37   | pred.  | 4.493                          |        |        |
| ANKRD40   | pred.  |                                |        | 0.505  |
| ANXA5     | pred.  | -7.012                         |        |        |
| ANXA6     | pred.  |                                |        | 0.216  |
| AOC3      | pred.  | -7.425                         |        |        |
| AOX1      | pred.  |                                |        | 0.799  |
| AP1G2     | pred.  |                                |        | -0.355 |
| AP2A1     | pred.  |                                |        | 0.298  |
| APEX2     | pred.  |                                |        | 0.199  |
| APOA1     | exp.   | -0.495                         |        | -0.453 |
| APOA2     | pred.  | -0.907                         |        | -0.457 |
| APOC1     | pred.  |                                |        | -0.454 |
| APOE      | pred.  | -0.786                         |        | -0.312 |
| APOE      | exp.   | -0.786                         |        | -0.312 |
| APOH      | pred.  | -2.413                         |        |        |
| AQP3      | pred.  |                                | 1.148  | 1.149  |
| ARC       | pred.  | -8.249                         |        |        |
| ARHGEF25  | pred.  |                                |        | -0.283 |
| ARHGEF40  | pred.  |                                | 0.216  | 0.187  |
| ARID5A    | pred.  |                                |        | -0.285 |
| ARL2      | pred.  |                                |        | -0.327 |
| ARMC9     | pred.  |                                |        | 0.337  |
| ARPP19    | pred.  | -7.384                         |        | 0.534  |
| ARRB1     | pred.  | 0.771                          |        | 0.432  |
| ASGR1     | pred.  |                                |        | -0.235 |
| ASPDH     | pred.  |                                |        | -0.532 |
| ATAT1     | pred.  | -7.906                         |        |        |
| ATF3      | pred.  |                                |        | -0.381 |
| ATF4      | pred.  | -1.606                         |        |        |
| ATN1      | pred.  | -1.109                         |        |        |
| ATP2A2    | pred.  |                                |        | 0.527  |
| ATP6V0E2  | pred.  |                                |        | 0.255  |
| ATP8B1    | pred.  |                                |        | 0.340  |
| ATXN7L2   | pred.  |                                |        | -0.378 |
| AXIN2     | pred.  | 8.523                          |        |        |
| AZIN1     | pred.  |                                |        | 0.288  |
| BAHD1     | pred.  |                                |        | 0.386  |
| BANF1     | pred.  | -2.335                         |        | -0.463 |
| BBX       | pred.  | -7.061                         |        | 0.499  |
| BCAR3     | pred.  | 8.581                          |        | 0.348  |
| BCL2L11   | pred.  |                                |        | 0.322  |
| BCL9      | pred.  |                                |        | 0.376  |

| gene name | status | log2(fold_change) |       |        |
|-----------|--------|-------------------|-------|--------|
|           |        | 2                 | PIO   | GA     |
| BDH1      | pred.  |                   |       | -0.291 |
| BNIP2     | pred.  |                   |       | 0.246  |
| BRCA1     | exp.   |                   |       | 0.368  |
| BRCA1     | pred.  |                   |       | 0.368  |
| BRI3BP    | pred.  |                   |       | 0.394  |
| BRPF3     | pred.  |                   |       | 0.585  |
| BRWD1     | pred.  |                   |       | 0.229  |
| BSG       | pred.  |                   |       | -0.346 |
| BTBD1     | pred.  |                   |       | 0.480  |
| BTBD2     | pred.  |                   | 0.168 |        |
| BTG2      | pred.  |                   |       | 0.306  |
| BZW2      | pred.  | -7.664            |       |        |
| C1QTNF3   | pred.  |                   |       | -0.958 |
| CALHM2    | pred.  |                   |       | 0.894  |
| CALR      | pred.  | -4.124            |       |        |
| CAMK2D    | pred.  |                   |       | 0.217  |
| CAP1      | pred.  |                   |       | 0.709  |
| CCDC85C   | pred.  |                   |       | 1.039  |
| CCDC92    | pred.  |                   |       | -0.236 |
| CCNO      | pred.  | -6.963            |       |        |
| CCT3      | pred.  | -1.323            |       |        |
| CD302     | pred.  |                   |       | 0.632  |
| CD74      | pred.  |                   |       | -0.381 |
| CDA       | pred.  | -7.074            |       |        |
| CDC27     | pred.  | -7.083            |       | 0.268  |
| CDC37     | pred.  | -0.982            |       | -0.302 |
| CDC45     | pred.  | -8.798            |       |        |
| CDH2      | pred.  | -6.892            |       | 0.449  |
| CDH24     | pred.  | -1.261            |       |        |
| CDK2      | pred.  | -7.162            |       | 0.204  |
| CDK2AP2   | pred.  |                   |       | -0.555 |
| CDK5      | pred.  | -0.421            |       |        |
| CDKN1A    | exp.   | -1.757            |       | 0.281  |
| CDRT4     | pred.  |                   |       | -1.594 |
| CEBPB     | pred.  | -7.502            |       |        |
| CEBPD     | pred.  |                   |       | -0.429 |
| CEP170    | pred.  |                   |       | 0.313  |
| CEP350    | pred.  |                   |       | 0.686  |
| CERK      | pred.  |                   |       | 0.271  |
| CHCHD10   | pred.  |                   | 0.291 |        |
| CHCHD3    | pred.  | -4.545            |       | 0.300  |
| CHEK2     | pred.  | -7.583            |       |        |
| CHMP1A    | pred.  | -0.764            |       |        |
| CHUK      | pred.  |                   |       | 0.543  |
| CIB1      | pred.  |                   |       | -0.308 |
| CISD1     | pred.  |                   |       | 0.267  |
| CITED2    | pred.  |                   |       | 0.400  |
| CLDN15    | pred.  | 1.066             |       |        |
| CLDN5     | pred.  |                   | 0.548 |        |
| CLIC4     | pred.  |                   |       | 0.391  |
| CLP1      | pred.  |                   |       | 0.384  |
| CLSTN1    | pred.  |                   |       | 0.407  |
| CLUH      | pred.  |                   | 0.244 | 0.403  |
| CNKSR1    | pred.  |                   |       | -0.311 |
| COG4      | pred.  |                   |       | -0.246 |
| COL18A1   | pred.  | -1.258            |       |        |
| COL6A1    | pred.  |                   |       | -0.282 |
| COMMD6    | pred.  | -7.888            |       | -0.334 |
| COMTD1    | pred.  |                   |       | -0.492 |
| COPS6     | pred.  |                   |       | -0.265 |
| CORO2A    | pred.  |                   |       | 0.387  |
| COX7B     | pred.  |                   |       | -0.390 |
| CPD       | pred.  |                   |       | 0.784  |

| gene name | status | log2(fold_change) |       |        |
|-----------|--------|-------------------|-------|--------|
|           |        | 2                 | PIO   | GA     |
| CPT1A     | pred.  |                   | 0.342 | 1.075  |
| CPT2      | pred.  |                   |       | 0.272  |
| CREB3L2   | pred.  |                   |       | 0.476  |
| CREB3L3   | pred.  |                   |       | 0.435  |
| CRY1      | pred.  |                   |       | 0.379  |
| CS        | pred.  |                   |       | 0.248  |
| CSF1R     | pred.  | -7.429            |       |        |
| CSNK1A1   | pred.  |                   |       | 0.985  |
| CSRP2     | pred.  |                   |       | -0.358 |
| CSTB      | pred.  |                   |       | -0.324 |
| CUL7      | pred.  | -1.396            |       | 0.264  |
| CUTA      | pred.  |                   |       | -0.258 |
| CWC25     | pred.  | -5.262            |       |        |
| CYGB      | pred.  |                   |       | -0.298 |
| CYP1A1    | pred.  | -6.748            |       | 1.351  |
| CYP8B1    | pred.  |                   |       | 0.364  |
| DAG1      | pred.  |                   |       | 0.666  |
| DBT       | pred.  | 0.888             |       | 0.371  |
| DDI2      | pred.  |                   |       | 0.707  |
| DDIT3     | pred.  | -8.404            |       | -0.471 |
| DDIT4     | pred.  | -7.662            | 0.393 | 0.519  |
| DECR2     | pred.  |                   |       | -0.300 |
| DEDD2     | pred.  | -0.658            |       |        |
| DEGS1     | pred.  | -0.881            |       |        |
| DENND4C   | pred.  | 1.258             |       | 0.771  |
| DENND5A   | pred.  |                   |       | 0.253  |
| DERL1     | pred.  | -7.302            |       |        |
| DET1      | pred.  | -5.432            |       |        |
| DGAT2     | pred.  |                   |       | 0.258  |
| DHCR7     | pred.  | -1.036            |       | 0.383  |
| DHRS3     | pred.  |                   |       | -0.499 |
| DIXDC1    | pred.  | 8.722             |       | 1.139  |
| DLAT      | pred.  |                   |       | 0.403  |
| DLD       | pred.  |                   |       | 0.292  |
| DLST      | pred.  |                   |       | 0.273  |
| DNAJA2    | pred.  | -6.972            |       |        |
| DNAJC1    | pred.  | -7.389            |       |        |
| DNAJC11   | pred.  |                   |       | 0.280  |
| DNAJC15   | pred.  |                   |       | -0.257 |
| DNTTIP1   | pred.  | -7.113            |       |        |
| DOCK8     | pred.  |                   |       | 0.723  |
| DOCK9     | pred.  |                   |       | 0.943  |
| DRD4      | pred.  |                   |       | -1.126 |
| DSP       | pred.  |                   |       | 0.382  |
| DTNBP1    | pred.  | -8.085            |       |        |
| DTX4      | pred.  |                   | 0.512 | 0.747  |
| DUSP1     | pred.  |                   | 0.609 |        |
| DUSP3     | pred.  |                   |       | 0.320  |
| DYNLRB1   | pred.  | -0.697            |       | -0.467 |
| E2F8      | pred.  |                   |       | 0.386  |
| EBPL      | pred.  |                   |       | -0.276 |
| ECH1      | pred.  | -1.343            |       |        |
| EEF2K     | pred.  |                   |       | 0.239  |
| EFR3A     | pred.  |                   |       | 0.451  |
| EHF       | pred.  | 8.342             |       |        |
| EHHADH    | pred.  |                   |       | 0.342  |
| EIF1      | pred.  | -1.513            |       | -0.300 |
| EIF4B     | pred.  |                   |       | 0.479  |
| EIF4EBP2  | pred.  |                   |       | 0.545  |
| ELK3      | pred.  | 6.833             |       | 0.397  |
| ELOVL5    | pred.  | -3.688            |       |        |
| ENAH      | pred.  |                   |       | 0.428  |
| ENC1      | pred.  |                   |       | -0.308 |

| gene name  | status | log2(fold_change) |        |        |
|------------|--------|-------------------|--------|--------|
|            |        | 2                 | PIO    | GA     |
| ENO1       | pred.  |                   |        | 0.187  |
| EPAS1      | pred.  |                   |        | 0.575  |
| EPHX1      | pred.  |                   |        | 0.258  |
| EPHX2      | pred.  |                   |        | -0.199 |
| EPOR       | pred.  | -7.364            |        |        |
| EPS8       | pred.  | -8.179            |        | 0.478  |
| ERC1       | pred.  |                   |        | 0.903  |
| ERGIC1     | pred.  |                   |        | 0.267  |
| ERLIN1     | pred.  |                   |        | 0.638  |
| ERLIN2     | pred.  |                   |        | 0.275  |
| ERMP1      | pred.  |                   |        | 0.386  |
| ETFA       | pred.  |                   |        | 0.286  |
| ETFDH      | pred.  |                   |        | 0.477  |
| ETV3       | pred.  |                   |        | 0.415  |
| ETV5       | pred.  |                   |        | 0.361  |
| EXOC6B     | pred.  |                   |        | 0.526  |
| EXOSC5     | pred.  |                   |        | -0.325 |
| EZH2       | pred.  |                   |        | -0.212 |
| FABP1      | pred.  |                   | 0.357  |        |
| FABP5      | pred.  |                   |        | -0.291 |
| FADS1      | pred.  |                   |        | 0.331  |
| FADS2      | pred.  |                   |        | 0.287  |
| FAM102A    | pred.  | -8.427            |        |        |
| FAM126A    | pred.  |                   |        | 0.337  |
| FAM129B    | pred.  |                   |        | 0.353  |
| FAM162A    | pred.  |                   |        | -0.501 |
| FAM98C     | pred.  |                   |        | -0.316 |
| FAR2       | pred.  | -6.751            |        |        |
| FASN       | pred.  | -1.217            |        | 0.400  |
| FASTK      | pred.  | -0.894            |        | -0.334 |
| FBF1       | pred.  | -1.260            |        |        |
| FBXO21     | pred.  |                   |        | 0.356  |
| FDPS       | pred.  |                   |        | 0.371  |
| FGFR1      | pred.  |                   |        | 0.221  |
| FGFRL1     | pred.  | -1.301            | 0.186  | 0.415  |
| FITM2      | pred.  |                   |        | 0.641  |
| FKBP10     | pred.  | -0.935            |        |        |
| FKBP5      | pred.  |                   |        | 0.548  |
| FOS        | pred.  | -8.112            |        |        |
| FOSL1      | pred.  |                   |        | -0.460 |
| FOXN2      | pred.  |                   | -0.225 |        |
| FOXN3      | pred.  |                   |        | 0.649  |
| FOXO3      | pred.  | -8.046            |        |        |
| FRK        | pred.  |                   |        | 0.685  |
| FRRS1      | pred.  |                   |        | 0.631  |
| G3BP1      | pred.  |                   |        | 0.294  |
| G6PC       | pred.  |                   |        | 0.544  |
| GADD45GIP1 | pred.  |                   |        | -0.369 |
| GAL3ST1    | pred.  |                   | 0.314  |        |
| GAMT       | pred.  |                   |        | -0.399 |
| GAPDH      | pred.  | -1.500            |        |        |
| GBF1       | pred.  |                   |        | 0.417  |
| GCC2       | pred.  | 3.951             |        | 0.536  |
| GCGR       | pred.  |                   | 1.968  |        |
| GCLC       | pred.  |                   |        | 0.243  |
| GCLM       | pred.  |                   |        | 0.394  |
| GEN1       | pred.  |                   |        | -0.258 |
| GF1B       | pred.  |                   |        | -1.168 |
| GFM1       | pred.  |                   |        | 0.442  |
| GFM2       | pred.  |                   |        | 0.347  |
| GLDC       | pred.  |                   |        | 0.291  |
| GLRX       | pred.  |                   | -0.266 | -0.313 |
| GMFB       | pred.  |                   |        | 0.300  |

| gene name | status | log2(fold_change) |       |        |
|-----------|--------|-------------------|-------|--------|
|           |        | 2                 | PIO   | GA     |
| GNA11     | pred.  |                   |       | 0.374  |
| GNA13     | pred.  |                   |       | 0.526  |
| GNAI1     | pred.  | -8.514            |       |        |
| GNAZ      | pred.  |                   |       | 0.216  |
| GNPNAT1   | pred.  |                   |       | 0.280  |
| GPAM      | pred.  |                   |       | 0.361  |
| GPC4      | pred.  |                   |       | 2.648  |
| GPR35     | pred.  | -0.922            |       |        |
| GPRC5B    | pred.  | -6.837            |       |        |
| GPT       | pred.  |                   |       | -0.486 |
| GPX3      | pred.  |                   | 0.220 |        |
| GPX4      | pred.  | -0.382            |       | -0.372 |
| GRID2IP   | pred.  | -8.155            |       | -2.893 |
| GSTK1     | pred.  | 0.514             |       | -0.291 |
| GSTM2     | pred.  |                   |       | -0.405 |
| GSTP1     | pred.  | -0.794            |       |        |
| GTF3A     | pred.  |                   |       | -0.273 |
| GTF3C4    | pred.  | -8.404            |       | 0.626  |
| GUSB      | pred.  | -2.910            |       |        |
| H2AFV     | pred.  |                   |       | -0.177 |
| HADHA     | pred.  |                   |       | 0.377  |
| HCFC1R1   | pred.  |                   |       | -0.444 |
| HDAC10    | pred.  | -0.771            |       | -0.477 |
| HDAC6     | pred.  |                   |       | -0.197 |
| HDHD3     | pred.  | 0.580             |       |        |
| HECTD1    | pred.  |                   |       | 0.672  |
| HECTD3    | pred.  | -7.780            |       |        |
| HES1      | pred.  |                   |       | -0.367 |
| HIBCH     | pred.  | -6.926            |       |        |
| HIC2      | pred.  | -7.252            |       | 0.305  |
| HIPK2     | pred.  |                   |       | 0.568  |
| HIRA      | pred.  | -6.682            |       | -0.474 |
| HMGA1     | pred.  |                   |       | 0.330  |
| HMGCS1    | pred.  |                   |       | 0.394  |
| HMGCS2    | pred.  |                   | 0.604 | 1.070  |
| HMOX1     | exp.   |                   | 0.400 |        |
| HNRNPL    | pred.  | 0.624             |       |        |
| HOMER2    | pred.  |                   |       | 0.320  |
| HOXB7     | pred.  |                   |       | -3.463 |
| HOXC6     | pred.  | -7.152            |       |        |
| HPCAL1    | pred.  | -7.731            |       |        |
| HPD       | pred.  | 0.551             |       |        |
| HSD17B11  | pred.  | -10.129           |       |        |
| HSD17B4   | pred.  |                   |       | 0.430  |
| HSP90AA1  | pred.  |                   |       | 0.452  |
| HSP90B1   | pred.  | -2.684            |       |        |
| HSPB1     | pred.  |                   |       | -0.460 |
| HSPD1     | pred.  | -2.977            |       |        |
| HSPE1     | pred.  |                   |       | -0.421 |
| HUNK      | pred.  |                   |       | 0.647  |
| HYLS1     | pred.  |                   |       | -0.363 |
| IDH1      | pred.  | -7.375            |       | 0.290  |
| IDH3A     | pred.  |                   |       | 0.487  |
| IDI1      | pred.  |                   |       | 0.365  |
| IFITM2    | pred.  |                   |       | -0.434 |
| IFNAR2    | pred.  |                   |       | -0.538 |
| IGF2      | pred.  |                   |       | 0.510  |
| IGF2BP2   | pred.  | -1.349            |       |        |
| IL17RB    | pred.  |                   |       | -0.432 |
| IMPA2     | pred.  |                   |       | 0.456  |
| IMPAD1    | pred.  |                   |       | 0.372  |
| INA       | pred.  | -7.052            |       |        |
| INCA1     | pred.  |                   |       | -0.356 |

| gene name | status | log2(fold_change) |       |        |
|-----------|--------|-------------------|-------|--------|
|           |        | 2                 | PIO   | GA     |
| INHBE     | pred.  |                   |       | 0.247  |
| INPPL1    | pred.  |                   |       | -0.179 |
| IP6K1     | pred.  |                   |       | 0.433  |
| IQSEC1    | pred.  |                   |       | 0.416  |
| IRAK2     | pred.  | 7.985             |       | 0.761  |
| IRF1      | exp.   |                   |       | -0.364 |
| ISCA1     | pred.  |                   |       | 0.316  |
| ISCU      | pred.  |                   |       | -0.260 |
| ITFG2     | pred.  |                   |       | -0.245 |
| ITGA6     | pred.  |                   |       | 0.574  |
| ITPR2     | pred.  |                   |       | 0.598  |
| IVNS1ABP  | pred.  |                   |       | -0.213 |
| JUND      | pred.  |                   |       | -0.366 |
| KAT2A     | pred.  |                   |       | -0.342 |
| KCTD6     | pred.  |                   |       | -0.308 |
| KDM2B     | pred.  |                   |       | 0.271  |
| KDM3A     | pred.  |                   |       | 0.259  |
| KDSR      | pred.  | -7.695            |       |        |
| KIF16B    | pred.  |                   |       | 0.354  |
| KIF3B     | pred.  |                   |       | 0.745  |
| KLB       | pred.  |                   |       | 0.598  |
| KLF11     | pred.  |                   |       | 1.073  |
| KRT18     | pred.  |                   |       | -0.409 |
| LACTB2    | pred.  |                   |       | -0.277 |
| LAMB1     | pred.  |                   |       | 0.278  |
| LAMB2     | pred.  |                   |       | 0.179  |
| LAMC3     | pred.  |                   |       | 0.499  |
| LBR       | pred.  |                   |       | 0.345  |
| LCAT      | pred.  |                   |       | -0.481 |
| LDLR      | pred.  |                   |       | 0.727  |
| LETM1     | pred.  |                   |       | 0.214  |
| LGALS1    | pred.  |                   |       | -0.298 |
| LIN28B    | pred.  |                   |       | 0.606  |
| LIPA      | exp.   |                   |       | 0.497  |
| LIPG      | pred.  |                   |       | 0.400  |
| LMAN1     | pred.  | -7.827            |       | 0.454  |
| LNX2      | pred.  |                   |       | 0.355  |
| LONP1     | pred.  |                   | 0.217 | 0.196  |
| LPCAT3    | pred.  |                   |       | 1.091  |
| LPIN1     | pred.  |                   |       | 0.343  |
| LPIN2     | pred.  |                   |       | 0.505  |
| LRIG3     | pred.  |                   |       | 0.737  |
| LRP1      | exp.   |                   |       | 0.947  |
| LRP11     | pred.  |                   |       | 0.365  |
| LRP4      | pred.  |                   |       | 0.494  |
| LRPPRC    | pred.  |                   |       | 0.458  |
| LRRC59    | pred.  | -2.217            |       |        |
| LRRC8A    | pred.  | -6.896            |       | 0.220  |
| LRRC8B    | pred.  |                   |       | 0.375  |
| LSS       | pred.  |                   |       | 0.339  |
| LTBP3     | pred.  |                   |       | -0.192 |
| LYSMD3    | pred.  |                   |       | 0.374  |
| MACF1     | pred.  |                   |       | 0.616  |
| MAF1      | pred.  | -1.196            |       |        |
| MAFG      | pred.  |                   |       | 0.400  |
| MAP3K2    | pred.  |                   |       | 0.274  |
| MAP4K3    | pred.  |                   |       | 0.489  |
| MAZ       | pred.  |                   |       | 0.380  |
| MBD2      | pred.  |                   |       | -0.348 |
| MBNL3     | pred.  |                   |       | 0.437  |
| MBOAT7    | pred.  |                   |       | 0.239  |
| MCF2L     | pred.  |                   |       | -0.245 |
| MCM7      | pred.  |                   |       | 0.316  |

| gene name | status | log2(fold_change) |       |        |
|-----------|--------|-------------------|-------|--------|
|           |        | 2                 | PIO   | GA     |
| MCM8      | pred.  |                   |       | 0.364  |
| MEF2D     | pred.  |                   |       | 0.237  |
| MEGF9     | pred.  |                   |       | 0.553  |
| MERTK     | pred.  |                   |       | 0.366  |
| METTL5    | pred.  |                   |       | -0.268 |
| MGAT1     | pred.  |                   |       | 0.241  |
| MGAT4B    | pred.  |                   | 0.166 | 0.208  |
| MGST2     | pred.  |                   |       | -0.336 |
| MGST3     | pred.  | -2.101            |       |        |
| MIPEP     | pred.  |                   |       | 0.335  |
| MKI67     | pred.  |                   |       | 0.554  |
| MLYCD     | pred.  | -7.431            |       | 0.355  |
| MPRIP     | pred.  |                   |       | 0.322  |
| MRPL18    | pred.  |                   |       | -0.364 |
| MRPL23    | pred.  | -1.078            |       | -0.712 |
| MRPL37    | pred.  |                   |       | 0.208  |
| MRPL47    | pred.  |                   |       | -0.309 |
| MRPL54    | pred.  |                   |       | -0.345 |
| MRPL9     | pred.  | -7.206            |       |        |
| MRV11     | pred.  | 7.160             |       |        |
| MSLN      | pred.  |                   |       | -0.354 |
| MTHFD1    | pred.  |                   |       | 0.295  |
| MTHFD2    | pred.  |                   |       | 0.376  |
| MTOR      | pred.  |                   |       | 0.336  |
| MUL1      | pred.  |                   |       | 0.543  |
| MUS81     | pred.  |                   |       | -0.385 |
| MYC       | pred.  |                   |       | 0.416  |
| MYH14     | pred.  |                   |       | 0.436  |
| MYH3      | pred.  |                   |       | -0.420 |
| MYO18A    | pred.  |                   |       | 0.340  |
| MYO1C     | pred.  |                   |       | 0.266  |
| MYOM3     | pred.  |                   |       | 0.392  |
| NAA10     | pred.  | -0.411            |       | -0.453 |
| NAA50     | pred.  |                   |       | 0.437  |
| NAMPT     | exp.   |                   |       | 0.391  |
| NCAPD3    | pred.  |                   |       | 0.240  |
| NCEH1     | pred.  | 7.985             |       | 0.383  |
| NCOR2     | pred.  |                   |       | 0.368  |
| NCS1      | pred.  |                   |       | 0.340  |
| NDRG1     | pred.  |                   | 0.281 | 0.584  |
| NDUFA11   | pred.  |                   |       | -0.385 |
| NDUFA5    | pred.  |                   |       | -0.283 |
| NDUFA6    | pred.  |                   |       | -0.306 |
| NDUFA8    | pred.  | -1.252            |       | -0.303 |
| NDUFA9    | pred.  | -2.346            |       | -0.599 |
| NDUFAF3   | pred.  |                   |       | -0.506 |
| NDUFB10   | pred.  |                   |       | -0.318 |
| NDUFB8    | pred.  | -1.244            |       |        |
| NDUFS1    | pred.  | 0.833             |       | 0.428  |
| NDUFS2    | pred.  |                   |       | 0.298  |
| NDUFS8    | pred.  |                   |       | -0.284 |
| NDUFV3    | pred.  |                   |       | -0.312 |
| NEIL1     | pred.  |                   |       | -0.283 |
| NEK9      | pred.  |                   |       | 0.236  |
| NEURL4    | pred.  | -0.882            |       |        |
| NFATC4    | pred.  | -0.488            |       |        |
| NFE2      | pred.  |                   | 0.335 |        |
| NFE2L1    | pred.  |                   |       | 0.524  |
| NFIX      | pred.  | -9.205            |       |        |
| NFKB2     | pred.  |                   |       | -0.293 |
| NGFR      | pred.  | -7.456            | 0.715 |        |
| NLN       | pred.  |                   |       | 0.416  |
| NME7      | pred.  | 8.007             |       |        |



| gene name | status | log2(fold_change) |        |        |
|-----------|--------|-------------------|--------|--------|
|           |        | 2                 | PIO    | GA     |
| NMNAT1    | pred.  |                   |        | 0.255  |
| NMT2      | pred.  |                   |        | 0.276  |
| NNAT      | pred.  |                   |        | 0.559  |
| NPC1      | pred.  |                   |        | 0.464  |
| NPEPL1    | pred.  |                   |        | -0.349 |
| NPR3      | pred.  | 7.306             |        |        |
| NQO1      | pred.  |                   |        | 0.218  |
| NR2C1     | pred.  |                   |        | -0.349 |
| NR2F6     | pred.  | -0.942            |        |        |
| NRCAM     | pred.  | -7.862            |        |        |
| NT5C2     | pred.  | 8.341             |        | 0.455  |
| NT5E      | pred.  |                   | -0.338 |        |
| NUCB2     | pred.  |                   |        | -0.287 |
| NUDT14    | pred.  |                   |        | -0.368 |
| NUPL2     | pred.  |                   | -0.220 |        |
| NUS1      | pred.  |                   |        | 0.253  |
| NXPH3     | pred.  |                   | 0.710  | 0.693  |
| OAS3      | pred.  |                   |        | 0.331  |
| OGFOD3    | pred.  |                   |        | 0.198  |
| OPHN1     | pred.  |                   |        | 0.633  |
| OSBPL11   | pred.  | -6.831            |        | 0.371  |
| OSR1      | pred.  |                   |        | -0.584 |
| OXR1      | pred.  |                   |        | 0.542  |
| PABPN1    | pred.  |                   |        | -0.350 |
| PACS1     | pred.  | 1.121             |        | 0.260  |
| PAK2      | pred.  |                   |        | 0.379  |
| PAN2      | pred.  |                   |        | -0.354 |
| PARP11    | pred.  |                   |        | 0.489  |
| PARP14    | pred.  |                   | -0.235 |        |
| PASK      | pred.  |                   |        | 0.191  |
| PCK1      | pred.  |                   | 0.775  | 0.667  |
| PCSK4     | pred.  |                   |        | -0.362 |
| PCSK5     | pred.  |                   |        | 0.570  |
| PCSK6     | pred.  | 0.945             |        | 0.829  |
| PCSK7     | pred.  |                   |        | 0.492  |
| PCTP      | pred.  |                   |        | 0.494  |
| PDK2      | pred.  |                   |        | 0.234  |
| PDLIM5    | pred.  |                   |        | 0.400  |
| PDP2      | pred.  |                   |        | 0.351  |
| PDRG1     | pred.  | -2.779            |        |        |
| PDZK1     | pred.  |                   | 0.202  |        |
| PELI3     | pred.  |                   |        | 0.284  |
| PEX11A    | pred.  |                   | 0.255  | 0.373  |
| PEX19     | pred.  |                   |        | 0.277  |
| PEX5      | pred.  |                   |        | 0.491  |
| PFKFB3    | pred.  | -7.081            |        | 0.577  |
| PFKL      | pred.  |                   | 0.199  |        |
| PGD       | pred.  | -1.019            |        |        |
| PGS1      | pred.  |                   | 0.178  |        |
| PHB2      | pred.  | -0.807            |        |        |
| PHLPP2    | pred.  |                   |        | 0.456  |
| PIAS1     | pred.  |                   |        | 0.293  |
| PIK3IP1   | pred.  | 8.121             |        |        |
| PIM1      | pred.  |                   | 0.242  |        |
| PIP5K1A   | pred.  |                   |        | 0.203  |
| PIP5K1B   | pred.  |                   |        | 0.376  |
| PJA1      | pred.  | -6.916            |        | 0.448  |
| PKDCC     | pred.  |                   |        | -0.270 |
| PKP2      | pred.  |                   |        | 0.313  |
| PLEKHH1   | pred.  | -7.421            |        |        |
| PLEKHM2   | pred.  |                   |        | 0.189  |
| PLIN2     | exp.   |                   | 0.649  | 0.978  |
| PLIN4     | pred.  |                   | 0.419  |        |

| gene name | status | log2(fold_change) |       |        |
|-----------|--------|-------------------|-------|--------|
|           |        | 2                 | PIO   | GA     |
| PLIN5     | pred.  |                   |       | -0.410 |
| PLK3      | pred.  |                   |       | -0.370 |
| PLXNA2    | pred.  |                   |       | 0.252  |
| PMPCB     | pred.  | 1.235             |       |        |
| PNN       | pred.  |                   |       | -0.303 |
| PNPLA1    | pred.  | -7.237            |       |        |
| PNPLA3    | pred.  |                   |       | 0.671  |
| POLR2A    | pred.  |                   |       | 0.616  |
| POLR2F    | pred.  | -1.195            |       | -0.349 |
| POP5      | pred.  |                   |       | -0.402 |
| POR       | pred.  |                   | 0.207 | 0.298  |
| PPARA     | pred.  |                   |       | 0.792  |
| PIIF      | pred.  |                   |       | 0.207  |
| PPM1F     | pred.  |                   |       | 0.264  |
| PPM1L     | pred.  |                   |       | 0.335  |
| PPP1CC    | pred.  | -8.439            |       |        |
| PPP1R14B  | pred.  | -1.133            |       |        |
| PPP1R15B  | pred.  |                   |       | 0.418  |
| PPP2R5B   | pred.  |                   |       | -0.467 |
| PPP3CA    | pred.  |                   |       | 0.345  |
| PRADC1    | pred.  |                   |       | -0.357 |
| PRDX6     | pred.  |                   |       | -0.220 |
| PREPL     | pred.  |                   |       | 0.371  |
| PRKAR2A   | pred.  |                   |       | 0.608  |
| PRKCA     | pred.  |                   |       | 0.827  |
| PRKDC     | pred.  |                   |       | 0.962  |
| PRKRIP1   | pred.  |                   |       | -0.280 |
| PROSER2   | pred.  | -8.287            |       |        |
| PROX1     | pred.  | -6.988            |       | 0.327  |
| PRPS1     | pred.  |                   |       | 0.357  |
| PRR36     | pred.  |                   |       | -0.447 |
| PRSS8     | pred.  |                   |       | 0.374  |
| PSMA1     | pred.  |                   |       | -0.385 |
| PSMD7     | pred.  |                   |       | 1.064  |
| PSME2     | pred.  | -8.272            |       | -0.296 |
| PSRC1     | pred.  |                   |       | -0.326 |
| PTGES     | pred.  | -7.034            |       |        |
| PTGR1     | pred.  | -7.193            |       | 0.711  |
| PTPN6     | pred.  |                   |       | -0.367 |
| PUS7L     | pred.  |                   |       | 0.313  |
| PYROXD2   | pred.  |                   |       | -0.398 |
| PZP       | pred.  | 8.362             |       |        |
| RAB11FIP4 | pred.  |                   |       | 0.279  |
| RAB11FIP5 | pred.  |                   | 0.353 | 0.595  |
| RAB3D     | pred.  |                   |       | 0.546  |
| RAD21     | pred.  | 8.089             |       |        |
| RAD23B    | pred.  | -6.655            |       |        |
| RAD54L    | pred.  |                   |       | 0.182  |
| RALGAPA2  | pred.  |                   |       | 0.968  |
| RAP1GAP2  | pred.  |                   |       | 0.431  |
| RARB      | pred.  | 7.219             |       |        |
| RARRES2   | pred.  |                   |       | -0.306 |
| RASD1     | pred.  | -6.855            |       | -0.449 |
| RASIP1    | pred.  | -5.111            |       |        |
| RASL10B   | pred.  |                   |       | 0.607  |
| RASSF3    | pred.  |                   |       | 0.325  |
| RASSF4    | pred.  |                   |       | -0.317 |
| RBKS      | pred.  | -7.850            |       |        |
| RBM39     | pred.  |                   |       | -0.451 |
| RBP1      | pred.  |                   |       | -0.456 |
| RBPMS     | pred.  |                   |       | -0.271 |
| RBX1      | pred.  |                   |       | -0.423 |
| RCL1      | pred.  | -8.739            |       |        |

| gene name | status | log2(fold_change) |        |        |
|-----------|--------|-------------------|--------|--------|
|           |        | 2                 | PIO    | GA     |
| RCN1      | pred.  |                   |        | -0.264 |
| RCN3      | pred.  |                   |        | -0.581 |
| REEP6     | pred.  |                   |        | -0.275 |
| RETSAT    | pred.  |                   | 0.187  | 0.264  |
| REV3L     | pred.  |                   |        | 0.660  |
| RGL3      | pred.  |                   |        | -0.321 |
| RGP1      | pred.  |                   |        | 0.665  |
| RGS3      | pred.  | -8.830            | 0.255  | 0.353  |
| RHBDF1    | pred.  |                   |        | -0.379 |
| RHOG      | pred.  |                   |        | -0.336 |
| RHPN2     | pred.  |                   |        | 0.348  |
| RMND1     | pred.  | 0.535             |        |        |
| RNF111    | pred.  |                   |        | 0.482  |
| RNF144A   | pred.  |                   |        | 0.589  |
| RNF168    | pred.  |                   |        | 0.217  |
| RNF34     | pred.  | -7.423            |        |        |
| RNF7      | pred.  |                   |        | -0.445 |
| ROCK2     | pred.  |                   |        | 0.447  |
| RPL14     | pred.  | -1.414            |        | -0.361 |
| RPL3      | pred.  | -0.822            |        |        |
| RPP30     | pred.  |                   |        | -0.232 |
| RPRD1B    | pred.  |                   |        | 0.501  |
| RPTOR     | pred.  |                   |        | 0.243  |
| RRBP1     | pred.  | -0.752            |        | -0.205 |
| RRN3      | pred.  |                   |        | 0.215  |
| RRP1B     | pred.  |                   |        | 0.314  |
| RUNDC1    | pred.  |                   |        | 0.253  |
| S100A1    | pred.  |                   |        | -0.472 |
| S100A10   | pred.  | -7.730            |        | -0.334 |
| S100A13   | pred.  |                   |        | -0.396 |
| SAT1      | exp.   |                   |        | -0.291 |
| SC5D      | pred.  |                   |        | 0.333  |
| SCAMP5    | pred.  |                   |        | 0.403  |
| SCARB1    | exp.   |                   |        | 0.199  |
| SCARB2    | pred.  |                   |        | 0.457  |
| SCN4B     | pred.  |                   | 2.141  |        |
| SCO1      | pred.  |                   |        | 0.322  |
| SCRN1     | pred.  |                   |        | 0.524  |
| SCYL2     | pred.  |                   |        | 0.354  |
| SDC4      | pred.  |                   |        | 0.275  |
| SDCBP2    | pred.  | 7.966             |        |        |
| SDHA      | pred.  |                   |        | 0.186  |
| SDHB      | pred.  | -7.353            |        |        |
| SEC23A    | pred.  |                   |        | 0.628  |
| SEL1L     | pred.  |                   |        | 0.752  |
| SEL1L3    | pred.  |                   |        | 0.726  |
| SEMA3G    | pred.  |                   |        | 0.307  |
| SEMA4B    | pred.  |                   |        | 0.325  |
| SENP3     | pred.  | -2.746            |        | 0.296  |
| SERPINE1  | pred.  |                   |        | 0.316  |
| SERPINF1  | pred.  | -0.998            |        |        |
| SERPINI1  | pred.  | -7.710            |        |        |
| SF3B4     | pred.  | -1.633            |        |        |
| SFSWAP    | pred.  |                   |        | -0.284 |
| SGK1      | exp.   | 6.827             | 0.204  |        |
| SGK2      | pred.  |                   | 0.607  | 0.787  |
| SGTB      | pred.  |                   | -0.348 |        |
| SH3BGRL2  | pred.  |                   |        | 0.378  |
| SH3BP2    | pred.  | 0.692             |        | 0.194  |
| SHANK3    | pred.  |                   |        | 0.388  |
| SIAH2     | pred.  |                   |        | 0.218  |
| SLC16A1   | pred.  |                   |        | 0.493  |
| SLC1A5    | pred.  | -0.916            |        |        |

| gene name  | status | log2(fold_change) |       |        |
|------------|--------|-------------------|-------|--------|
|            |        | 2                 | PIO   | GA     |
| SLC25A20   | pred.  |                   |       | 0.657  |
| SLC25A42   | pred.  |                   | 0.376 | 0.426  |
| SLC25A44   | pred.  |                   |       | 0.237  |
| SLC25A47   | pred.  |                   | 0.646 |        |
| SLC25A5    | pred.  |                   |       | 0.257  |
| SLC27A4    | pred.  |                   |       | 0.323  |
| SLC29A3    | pred.  | -7.547            |       | 0.467  |
| SLC2A4     | pred.  |                   |       | -0.332 |
| SLC31A1    | pred.  |                   |       | 0.671  |
| SLC38A4    | pred.  |                   |       | 0.623  |
| SLC41A1    | pred.  |                   |       | 0.479  |
| SLC44A1    | pred.  |                   |       | 0.243  |
| SLC48A1    | pred.  |                   |       | 0.330  |
| SLC4A2     | pred.  |                   |       | 0.430  |
| SLC4A7     | pred.  |                   |       | 0.559  |
| SLC52A2    | pred.  | -1.005            |       |        |
| SLC6A8     | pred.  |                   | 0.230 |        |
| SLC8A3     | pred.  | -7.470            |       |        |
| SLIT2      | pred.  | -6.892            |       |        |
| SMAD5      | pred.  |                   |       | 0.445  |
| SMAD7      | pred.  | -7.571            |       |        |
| SMAP2      | pred.  |                   |       | 0.340  |
| SMARCA2    | pred.  |                   |       | 0.438  |
| SMARCA4    | pred.  |                   |       | 0.270  |
| SMARCA5    | pred.  | -8.361            |       | 0.259  |
| SMPD3      | pred.  | -6.813            |       | -0.618 |
| SNN        | pred.  | -6.813            |       | 0.211  |
| SNRNP70    | pred.  | -1.851            |       | -0.249 |
| SNRNPB     | pred.  | -0.668            |       |        |
| SNX6       | pred.  |                   |       | 0.316  |
| SOD1       | pred.  |                   |       | -0.297 |
| SOD2       | pred.  | 1.640             |       |        |
| SOGA1      | pred.  |                   |       | 0.488  |
| SORD       | pred.  | -6.903            |       | 0.357  |
| SOX13      | pred.  |                   |       | 0.236  |
| SOX9       | pred.  | 4.442             |       |        |
| SPATC1     | pred.  |                   |       | 1.314  |
| SPC25      | pred.  | 1.089             |       |        |
| SPIRE2     | pred.  |                   |       | -0.238 |
| SPNS1      | pred.  | -7.425            |       |        |
| SPNS2      | pred.  |                   | 0.928 |        |
| SPSB1      | pred.  | -8.263            |       |        |
| SQSTM1     | pred.  |                   |       | 0.601  |
| SRP68      | pred.  |                   |       | 0.271  |
| SRP72      | pred.  |                   |       | 0.382  |
| SRPX2      | pred.  |                   |       | -0.462 |
| SRSF6      | pred.  |                   |       | -0.396 |
| SSH2       | pred.  |                   |       | 0.464  |
| ST3GAL6    | pred.  |                   |       | -0.531 |
| ST6GALNAC4 | pred.  |                   |       | 0.335  |
| STARD10    | pred.  |                   |       | -0.434 |
| STAT1      | pred.  |                   |       | 0.477  |
| STAT5A     | pred.  |                   |       | 0.564  |
| STBD1      | pred.  | -8.913            |       |        |
| STIM1      | pred.  | -7.269            |       | 0.400  |
| STK10      | pred.  |                   |       | 0.357  |
| STK38L     | pred.  |                   |       | 0.358  |
| STOML2     | pred.  | -1.717            |       |        |
| STX18      | pred.  |                   |       | -0.229 |
| SUCLG2     | pred.  |                   |       | 0.283  |
| SUDS3      | pred.  |                   |       | 0.347  |
| SULF2      | pred.  | -6.676            |       |        |
| SULT2A1    | pred.  |                   | 0.192 | 0.296  |

| gene name | status | log2(fold_change) |        |        |
|-----------|--------|-------------------|--------|--------|
|           |        | 2                 | PIO    | GA     |
| SYNJ2     | pred.  |                   |        | 0.203  |
| TAF9      | pred.  | -7.001            |        |        |
| TAF9B     | pred.  | 1.668             |        |        |
| TAGLN2    | pred.  | -1.275            |        |        |
| TAZ       | pred.  |                   |        | -0.335 |
| TBC1D8    | pred.  |                   |        | -0.199 |
| TBX10     | pred.  |                   |        | -0.595 |
| TCEA3     | pred.  |                   |        | -0.263 |
| TECR      | pred.  |                   |        | -0.311 |
| TEX2      | pred.  |                   |        | 0.346  |
| TFB1M     | pred.  |                   |        | -0.321 |
| TFPI      | pred.  |                   | -0.245 | -0.296 |
| TGFA      | pred.  |                   |        | 0.330  |
| TGFBI     | pred.  |                   |        | 0.299  |
| TGFBR2    | pred.  | -6.822            |        | 0.472  |
| TGM2      | pred.  |                   |        | 0.428  |
| THOC6     | pred.  |                   |        | -0.343 |
| THOP1     | pred.  | -0.917            |        |        |
| TIMM23    | pred.  | -9.876            |        |        |
| TIMM8B    | pred.  |                   |        | -0.285 |
| TIMM9     | pred.  |                   |        | -0.284 |
| TIMP1     | pred.  |                   |        | -0.505 |
| TLCD1     | pred.  | -1.409            |        |        |
| TLE3      | pred.  | -0.798            |        |        |
| TM7SF2    | pred.  | -0.935            |        |        |
| TMBIM1    | pred.  |                   |        | 0.208  |
| TMCO6     | pred.  |                   |        | -0.261 |
| TMED8     | pred.  |                   |        | 0.424  |
| TMEM11    | pred.  |                   |        | -0.305 |
| TMEM135   | pred.  |                   |        | 0.329  |
| TMEM136   | pred.  |                   |        | 0.344  |
| TMEM164   | pred.  |                   |        | 0.488  |
| TMEM170B  | pred.  |                   |        | 0.371  |
| TMEM25    | pred.  | -8.038            |        |        |
| TMEM37    | pred.  |                   |        | 0.174  |
| TMEM53    | pred.  |                   | 0.329  | 0.318  |
| TMEM63B   | pred.  |                   | 0.162  | 0.159  |
| TMEM64    | pred.  |                   |        | 0.518  |
| TMTC1     | pred.  |                   |        | 0.733  |
| TNFRSF12A | pred.  |                   |        | -0.472 |
| TNFSF10   | exp.   | -7.627            |        |        |
| TNFSF12   | pred.  | -7.062            |        | -0.311 |
| TNIP1     | exp.   | -1.395            |        |        |
| TNNC1     | pred.  | 0.676             |        |        |
| TOR1B     | pred.  |                   |        | 0.358  |
| TOR3A     | pred.  |                   |        | 0.304  |
| TPD52L1   | pred.  | 3.029             |        |        |
| TPM2      | pred.  |                   |        | -0.706 |
| TRIM14    | pred.  | 7.939             |        | 0.463  |
| TRIM25    | pred.  |                   |        | 0.530  |
| TRIM35    | pred.  |                   |        | 0.387  |
| TRIM44    | pred.  |                   |        | 0.588  |
| TRIO      | pred.  |                   |        | 0.393  |
| TRIT1     | pred.  |                   |        | -0.317 |
| TRPT1     | pred.  |                   |        | -0.378 |
| TRPV1     | pred.  |                   |        | -0.337 |
| TRUB1     | pred.  |                   |        | 0.505  |
| TSC22D1   | exp.   |                   |        | 0.207  |
| TSKU      | pred.  |                   |        | 0.329  |
| TSPAN17   | pred.  |                   |        | 0.282  |
| TSPO      | pred.  | -3.315            |        |        |
| TTC39B    | pred.  | 1.154             |        |        |
| TTF2      | pred.  |                   |        | 0.301  |

| gene name | status | log2(fold_change) |       |        |
|-----------|--------|-------------------|-------|--------|
|           |        | 2                 | PIO   | GA     |
| TTI1      | pred.  |                   |       | 0.418  |
| TUBA4A    | pred.  |                   |       | -0.418 |
| TUFM      | pred.  | -0.788            |       |        |
| TYSND1    | pred.  |                   | 0.245 |        |
| UBAP1     | pred.  |                   |       | 0.204  |
| UBE2C     | pred.  |                   |       | -0.362 |
| UBE4B     | pred.  |                   |       | 0.315  |
| UBFD1     | pred.  |                   |       | 0.408  |
| UBQLN1    | pred.  | -1.527            |       | 0.418  |
| UBXN11    | pred.  |                   |       | -0.412 |
| UBXN2B    | pred.  |                   |       | 0.374  |
| UCKL1     | pred.  |                   |       | -0.248 |
| UFM1      | pred.  | -6.821            |       |        |
| UGDH      | pred.  |                   |       | 0.490  |
| UQCR10    | pred.  | -1.586            |       | -0.452 |
| UQCRQ     | pred.  | -1.431            |       | -0.376 |
| URGCP     | pred.  |                   |       | -0.294 |
| UROD      | pred.  | -0.610            |       |        |
| USP6NL    | pred.  |                   |       | 0.250  |
| USP8      | pred.  |                   |       | 0.462  |
| VAPB      | pred.  | -4.017            |       | 0.306  |
| VAT1      | pred.  |                   |       | 0.240  |
| VEGFA     | exp.   |                   |       | -0.274 |
| VNN1      | pred.  | 8.703             |       |        |
| VRK2      | pred.  |                   |       | 0.545  |
| WAC       | pred.  |                   |       | 0.303  |
| WARS      | pred.  |                   |       | 0.312  |
| WBP11     | pred.  |                   |       | 0.205  |
| WDR1      | pred.  |                   |       | 0.288  |
| WDR48     | pred.  |                   |       | 0.538  |
| WDR6      | pred.  | -8.480            |       |        |
| WDR76     | pred.  |                   |       | 0.408  |
| WWTR1     | pred.  |                   |       | 0.294  |
| XIAP      | pred.  |                   |       | 0.382  |
| XIRP2     | pred.  | 7.002             |       |        |
| XRCC5     | pred.  | -1.299            |       | 0.194  |
| YARS      | pred.  |                   |       | 0.285  |
| YIF1A     | pred.  | -0.985            |       |        |
| YPEL3     | pred.  |                   |       | -0.546 |
| YWHAB     | pred.  |                   |       | 0.293  |
| ZC3H3     | pred.  |                   |       | -0.309 |
| ZDHHC12   | pred.  |                   |       | -0.410 |
| ZDHHC8    | pred.  |                   |       | -0.285 |
| ZHX2      | pred.  | -8.141            |       | 0.419  |
| ZMYND15   | pred.  |                   |       | -0.620 |
| ZNHIT1    | pred.  | 0.593             |       | -0.459 |
| ZNHIT6    | pred.  |                   |       | 0.256  |

## Synthesis of 2

**2** was synthesized over seven convergent steps following previously reported protocols<sup>3,4</sup> with adaptations according to Scheme S1. Thiobarbituric acid (**3**) was reacted with ethyl bromoacetate (**4**) to thioether **5** which was then chlorinated using POCl<sub>3</sub> to obtain **6**. In parallel, 3-nitrophenol (**7**) was methylated with iodomethane to **8** and subsequently hydrogenated to aniline **9**. Aniline **9** and chloropyrimidine **6** were then coupled to **10** by nucleophilic aromatic substitution. After demethylation of the methoxy group and concomitant ester hydrolysis with boron tribromide to **11**, Williamson ether synthesis with 2-bromoethylbenzene (**12**) produced **2** in 12% overall yield.

### Scheme S1. Synthesis of **2**.<sup>a</sup>

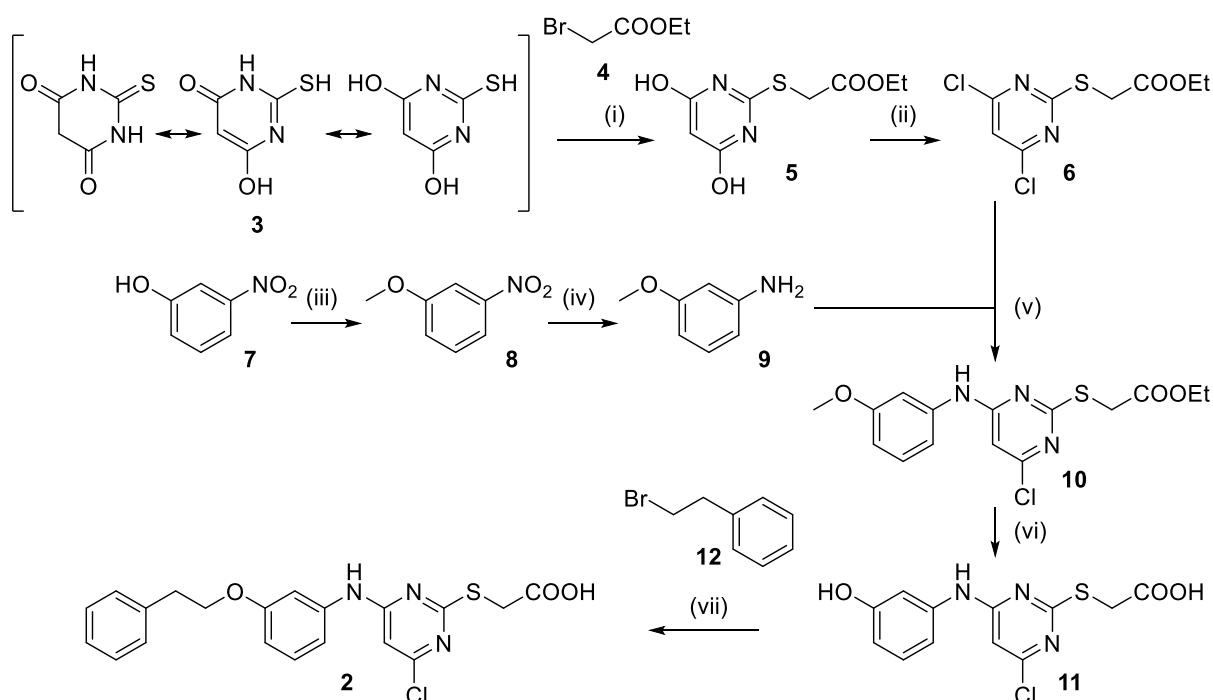

<sup>a</sup> Reagents & Conditions: (i) NaOH, H<sub>2</sub>O/EtOH, 60 °C, 4.5 h, 65%; (ii) POCl<sub>3</sub>, diethyl aniline, 90 °C, 5 h, 75%; (iii) CH<sub>3</sub>I, NaH, DMF, r.t., 24 h, 82%; (iv) H<sub>2</sub>, Pd(C), EtOAc, r.t., 15 h, 92%; (v) Hünig's base, DMF, 120 °C, 20 h, 63%; (vi) BBr<sub>3</sub>, CH<sub>2</sub>Cl<sub>2</sub>, r.t., 16 h, 81%; (vii) K<sub>2</sub>CO<sub>3</sub>, KI, DMF, 80 °C, 23 h, 47%.

## Materials & Methods

### Chemistry

#### *General*

All chemicals and solvents used were obtained from commercial sources (Sigma Aldrich, TCI, Alfa Aesar, BLDpharm). They were at least 95% pure and were used without further purification. Reactions were performed when needed with argon as an inert gas in absolute solvents from Sigma Aldrich. For purification by column chromatography, technical solvents, without further purification, were used. The deuterated solvents DMSO- $d_6$  and MeOH- $d_4$  used for NMR spectroscopy were purchased and used without further drying. Reactions were monitored by thin-layer chromatography (TLC) using silica gel (particle size of 60  $\mu$ M) coated aluminum plates with UV254 fluorescence indicator from Macherey-Nagel. Purification by column chromatography was performed using silica gel from Sigma Aldrich. NMR spectra were recorded on a Bruker AV 500 spectrometer (Bruker Corporation, Billerica, MA, USA). Chemical shift ( $\delta$ ) values were expressed in ppm and coupling constants ( $J$ ) in hertz (Hz). ESI mass spectra were recorded on a VG Platform II instrument (Thermo Fisher Scientific, Waltham, MA, USA) and high-resolution mass spectra on an LTQ Orbitrap XL instrument (Thermo Fisher Scientific). Purity of all final products was analyzed by HPLC on a Varian ProStar HPLC from SpectraLab Scientific Inc. equipped with a MultiHigh 100 Phenyl-5 $\mu$ , 240 + 4 mm column, at a flow rate of 1 mL per minute and UV detection (254 nm and 280 nm). Only compounds with a purity of  $\geq$  95% (AUC at 254 nm and 280 nm) were used for biological assays. The synthesis of **1** and precursors has been reported previously<sup>4</sup>.

#### *Synthesis and analytical characterization data*

**3-Nitroanisole (8)**: DMF (15 mL) was added to 3-nitrophenol (**7**, 642 mg, 4.61 mmol, 1.00 eq) and NaH (111 mg, 4.61 mmol, 1.00 eq) at 0 °C. Methyl iodide (315  $\mu$ L, 5.07 mmol, 1.10 eq) was added dropwise at 0 °C and the reaction mixture was stirred at room temperature for 24 hours. Then H<sub>2</sub>O (10 mL) was added, and the mixture was extracted three times with ethyl acetate (10 mL). The organic layers were combined, dried over Na<sub>2</sub>SO<sub>4</sub> and the solvent was evaporated in vacuo. Further purification was performed by column chromatography (*n*-hexane/ethyl acetate 9:1) to yield **8** as a colorless solid (82%). <sup>1</sup>H-NMR (300 MHz, methanol- $d_4$ ):  $\delta$  = 7.78-7.74 (m, 1H), 7.68-7.67 (m, 1H), 7.46 (t,  $J$  = 8.2 Hz, 1H), 7.30-7.26 (m, 1H), 3.86 (s, 3H) ppm. <sup>13</sup>C-NMR (75 MHz, methanol- $d_4$ ):  $\delta$  = 160.34, 129.91, 120.54, 115.03, 107.94, 55.01 ppm. MS (ESI+):  $m/z$  no molecular ion.

***m*-Anisidine (9)**: 3-Nitroanisole (**8**, 1.21 g, 7.89 mmol, 1.00 eq) was dissolved in ethyl acetate (100 mL) and Pd(C) (84.0 mg, 789  $\mu$ mol, 0.10 eq) was added. The suspension was stirred at room temperature under hydrogen atmosphere for 15 hours. The reaction mixture was then filtered through Celite and dried over Na<sub>2</sub>SO<sub>4</sub>. Evaporation of the solvent in vacuo yielded **9** as a brown oil (92%). <sup>1</sup>H-NMR (300 MHz, DMSO- $d_6$ ):  $\delta$  = 6.89 (t,  $J$  = 8.1 Hz, 1H), 6.16-6.13 (m, 2H), 6.09-6.05 (m, 1H), 5.01 (s, 2H), 3.64 (s, 3H) ppm. <sup>13</sup>C-NMR (75 MHz, DMSO- $d_6$ ):  $\delta$  = 160.27, 149.98, 129.54, 106.86, 101.47, 99.44, 55.54 ppm. MS (ESI+):  $m/z$  124.06 ([M+H]<sup>+</sup>).

**Ethyl 2-((4-chloro-6-((3-methoxyphenyl)amino)pyrimidin-2-yl)sulfanyl)acetate (10):** Ethyl-2-((4,6-dichloropyrimidin-2-yl)sulfanyl)acetate (**6**, 256 mg, 957  $\mu\text{mol}$ , 1.00 eq) was dissolved in a mixture of DMF (10 mL) and diisopropylethylamine (157  $\mu\text{L}$ , 1.14 mmol, 1.19 eq). *m*-Anisidine (**9**, 118 mg, 957  $\mu\text{mol}$ , 1.00 eq) was added, and the solution was stirred for 20 h at 120 °C. After cooling to room temperature, ethyl acetate (30 mL) was added, and the mixture was washed three times with H<sub>2</sub>O (30 mL). The organic layer was dried over Na<sub>2</sub>SO<sub>4</sub> and the solvent was evaporated in vacuo. Further purification was performed by column chromatography (*n*-hexane/acetone 8:1) to yield **10** as a brown oil (63%). <sup>1</sup>H-NMR (300 MHz, methanol-*d*<sub>4</sub>):  $\delta$  = 7.23 (t, *J* = 8.1 Hz, 1H), 7.17-7.16 (m, 1H), 7.09-7.05 (m, 1H), 6.71-6.67 (m, 1H), 6.43 (s, 1H), 4.11 (q, *J* = 7.1 Hz, 2H), 3.96 (s, 2H), 3.01 (s, 3H), 1.20 (t, *J* = 7.1 Hz, 3H) ppm. <sup>13</sup>C-NMR (75 MHz, methanol-*d*<sub>4</sub>):  $\delta$  = 170.53, 169.64, 161.13, 160.29, 158.21, 139.63, 129.27, 113.15, 109.2, 106.77, 100.29, 61.35, 54.39, 32.66, 12.99 ppm. MS (ESI+): *m/z* 375.99 ([M+Na]<sup>+</sup>).

**2-((4-Chloro-6-((3-hydroxyphenyl)amino)pyrimidin-2-yl)sulfanyl)acetic acid (11):** Ethyl 2-((4-chloro-6-((3-methoxyphenyl)amino)pyrimidin-2-yl)sulfanyl)acetate (**10**, 212 mg, 599  $\mu\text{mol}$ , 1.00 eq) was dissolved in dichloromethane (7 mL). Boron tribromide (115  $\mu\text{L}$ , 1.20 mmol, 2.00 eq) was added dropwise and the reaction was stirred at room temperature for 16 hours. Then H<sub>2</sub>O (10 mL) was added and the mixture was extracted three times with ethyl acetate (10 mL). The organic layers were combined, dried over Na<sub>2</sub>SO<sub>4</sub> and the solvent was evaporated in vacuo. Further purification was performed by column chromatography (*n*-hexane/acetone 3:2) to yield **11** as a beige solid (81%). <sup>1</sup>H-NMR (300 MHz, methanol-*d*<sub>4</sub>):  $\delta$  = 7.14 (t, *J* = 8.4 Hz, 1H), 7.01-6.98 (m, 2H), 6.57-6.53 (m, 1H), 6.41 (s, 1H), 3.95 (s, 2H) ppm. <sup>13</sup>C-NMR (75 MHz, methanol-*d*<sub>4</sub>):  $\delta$  = 171.5, 170.6, 161.2, 158.2, 157.7, 139.5, 129.4, 112.3, 110.9, 107.95, 99.9, 32.7 ppm. MS (ESI+): *m/z* 312.08 ([M+H]<sup>+</sup>).

**2-((4-Chloro-6-((3-phenethoxyphenyl)amino)pyrimidin-2-yl)thio)acetic acid (2):** 2-((4-Chloro-6-((3-hydroxyphenyl)amino)pyrimidin-2-yl)sulfanyl)acetic acid (**11**, 42.2 mg, 136  $\mu\text{mol}$ , 1.00 eq), 2-bromoethylbenzene (**12**, 18.5  $\mu\text{L}$ , 136  $\mu\text{mol}$ , 1.00 eq) and K<sub>2</sub>CO<sub>3</sub> (56.3 mg, 407  $\mu\text{mol}$ , 2.99 eq) were suspended in DMF (10 mL) and the mixture was stirred at 80 °C for 27 hours. After cooling to room temperature, ethyl acetate was added, and the mixture was washed three times with H<sub>2</sub>O (30 mL). The organic layer was dried over Na<sub>2</sub>SO<sub>4</sub> and the solvent was evaporated in vacuo. Further purification was performed by column chromatography (*n*-hexane/acetone 2:1) to yield **2** as a beige oil (47%). <sup>1</sup>H-NMR (500 MHz, methanol-*d*<sub>4</sub>):  $\delta$  = 7.22-7.19 (m, 2H), 7.15-7.14 (m, 3H), 7.11 (t, *J* = 8.1 Hz, 1H), 7.01-7.00 (m, 1H), 6.93-6.91 (m, 1H), 6.58-6.56 (m, 1H), 6.37 (s, 1H), 4.23 (t, *J* = 6.9 Hz, 2H), 3.92 (s, 2H), 2.85 (t, *J* = 6.9 Hz, 2H) ppm. <sup>13</sup>C-NMR (125 MHz, methanol-*d*<sub>4</sub>):  $\delta$  = 171.75, 171.08, 162.47, 159.48, 159.05, 140.81, 139.15, 130.70, 129.87, 129.38, 127.41, 113.62, 112.25, 109.46, 101.49, 67.35, 35.77, 33.98 ppm. MS (ESI+): *m/z* 438.50 ([M+Na]<sup>+</sup>). HRMS (MALDI): *m/z* calculated 416.08302 for C<sub>20</sub>H<sub>18</sub>ClN<sub>3</sub>O<sub>3</sub>S, found 416.08310 ([M+H]<sup>+</sup>).

## PPAR $\gamma$ LBD expression, purification and crystallization

The recombinant PPAR $\gamma$  LBD was expressed in *E. coli* and purified initially by Ni<sup>2+</sup>-affinity chromatography. The N-terminal histidine tag was removed by TEV treatment, and the cleaved protein was further purified by size exclusion chromatography in 20 mM Tris, pH 7.5, 200 mM NaCl, 0.5 mM TCEP. The ligands (4 mM; ~10-fold excess) were added to the protein (13 mg/mL) prior to crystallization using sitting drop vapour diffusion at 20 °C and the conditions listed in table below. Crystals were cryo-protected with mother liquor supplemented with 25% glycerol or 20% ethylene glycol. Diffraction data were collected at Swiss Light Source, and were processed and scaled with XDS<sup>5</sup> and aimless<sup>6</sup>, respectively. Molecular replacement was performed using Phaser<sup>7</sup> and the coordinates of PPAR $\gamma$  (pdb id 6TSG<sup>8</sup>). Manual model rebuilding alternated with structure refinement were performed in COOT<sup>9</sup> and REFMAC5<sup>10</sup>. The data collection and refinement statistics are summarized in the table below.

### Data collection and refinement statistics

| Complex                                         | 1 (JP85)                                                                                   | 2 (SA112)                                                                                  | WY14643<br>(dual binding;<br>active form)                                                  | WY14643<br>(single binding;<br>inactive form)                                                    | Apo inactive                                                                               |
|-------------------------------------------------|--------------------------------------------------------------------------------------------|--------------------------------------------------------------------------------------------|--------------------------------------------------------------------------------------------|--------------------------------------------------------------------------------------------------|--------------------------------------------------------------------------------------------|
| <b>PDB accession code</b>                       | 8ATY                                                                                       | 8ATZ                                                                                       | 8CPI                                                                                       | 8CPH                                                                                             | 8CPJ                                                                                       |
| <b>Data Collection</b>                          |                                                                                            |                                                                                            |                                                                                            |                                                                                                  |                                                                                            |
| Resolution <sup>a</sup> (Å)                     | 44.30-1.90<br>(1.97-1.90)                                                                  | 46.33-1.95<br>(2.02-1.95)                                                                  | 46.38-2.10<br>(2.17-2.10)                                                                  | 44.50-2.40<br>(2.51-2.40)                                                                        | 44.62-2.40<br>(2.48-2.40)                                                                  |
| Spacegroup                                      | <i>P</i> 4 <sub>3</sub> 2 <sub>1</sub> 2                                                   | <i>P</i> 4 <sub>3</sub> 2 <sub>1</sub> 2                                                   | <i>P</i> 4 <sub>3</sub> 2 <sub>1</sub> 2                                                   | <i>P</i> 2 <sub>1</sub> 2 <sub>1</sub> 2 <sub>1</sub>                                            | <i>P</i> 4 <sub>1</sub> 2 <sub>1</sub> 2                                                   |
| Cell dimensions                                 | <i>a</i> , <i>b</i> = 65.3, <i>c</i> =<br>156.0 Å<br>$\alpha$ , $\beta$ , $\gamma$ = 90.0° | <i>a</i> , <i>b</i> = 65.5, <i>c</i> =<br>157.4 Å<br>$\alpha$ , $\beta$ , $\gamma$ = 90.0° | <i>a</i> , <i>b</i> = 65.6, <i>c</i> =<br>157.3 Å<br>$\alpha$ , $\beta$ , $\gamma$ = 90.0° | <i>a</i> = 62.5, <i>b</i> = 63.4, <i>c</i> =<br>168.4 Å<br>$\alpha$ , $\beta$ , $\gamma$ = 90.0° | <i>a</i> , <i>b</i> = 63.1, <i>c</i> =<br>168.1 Å<br>$\alpha$ , $\beta$ , $\gamma$ = 90.0° |
| No. unique reflections <sup>a</sup>             | 27,306 (2,612)                                                                             | 25,916 (2,487)                                                                             | 20,906 (2,002)                                                                             | 26,908 (3,218)                                                                                   | 14,070 (1,341)                                                                             |
| Completeness <sup>a</sup> (%)                   | 99.3 (98.5)                                                                                | 100.0 (100.0)                                                                              | 100.0 (100.0)                                                                              | 99.8 (99.5)                                                                                      | 100.0 (100.0)                                                                              |
| <i>I</i> / $\sigma$ <sup>a</sup>                | 16.6 (2.2)                                                                                 | 14.1 (2.0)                                                                                 | 23.5 (2.0)                                                                                 | 17.2 (1.8)                                                                                       | 19.6 (2.0)                                                                                 |
| R <sub>merge</sub> <sup>a</sup>                 | 0.059 (0.877)                                                                              | 0.068 (0.989)                                                                              | 0.045 (1.085)                                                                              | 0.058 (1.255)                                                                                    | 0.101 (1.387)                                                                              |
| CC (1/2)                                        | 0.999 (0.767)                                                                              | 0.999 (0.867)                                                                              | 1.000 (0.833)                                                                              | 1.000 (0.738)                                                                                    | 0.999 (0.798)                                                                              |
| Redundancy <sup>a</sup>                         | 8.7 (8.5)                                                                                  | 11.1 (11.6)                                                                                | 11.8 (12.5)                                                                                | 9.6 (9.4)                                                                                        | 13.8 (14.2)                                                                                |
| <b>Refinement</b>                               |                                                                                            |                                                                                            |                                                                                            |                                                                                                  |                                                                                            |
| No. atoms in refinement<br>(P/L/O) <sup>b</sup> | 2,199/ 46/ 185                                                                             | 2,221/ 28/ 128                                                                             | 2,224/ 42/ 44                                                                              | 4,231/ 42/ 36                                                                                    | 2,185/ -/ 14                                                                               |
| B factor (P/L/O) <sup>b</sup> (Å <sup>2</sup> ) | 43/ 45/ 49                                                                                 | 52/ 78/ 51                                                                                 | 73/ 99/ 59                                                                                 | 95/ 114/ 71                                                                                      | 97/ -/ 68                                                                                  |
| R <sub>fact</sub> (%)                           | 17.6                                                                                       | 19.7                                                                                       | 22.2                                                                                       | 21.6                                                                                             | 23.8                                                                                       |
| R <sub>free</sub> (%)                           | 20.1                                                                                       | 24.5                                                                                       | 28.2                                                                                       | 26.3                                                                                             | 28.2                                                                                       |
| rms deviation bond <sup>c</sup> (Å)             | 0.015                                                                                      | 0.014                                                                                      | 0.011                                                                                      | 0.011                                                                                            | 0.012                                                                                      |
| rms deviation angle <sup>c</sup> (°)            | 1.5                                                                                        | 1.3                                                                                        | 1.2                                                                                        | 1.3                                                                                              | 1.1                                                                                        |
| Crystallization condition                       | 1.4 M ammonium sulfate, 0.1 M tris 8.0                                                     | 1.6 M ammonium sulfate, 0.1 M tris 7.5                                                     | 1.6 M ammonium sulfate, 0.1 M tris 8.0                                                     | 30% PEG 3350, 0.15 M sodium citrate                                                              | 27% PEG 3350, 0.15 M sodium citrate                                                        |

<sup>a</sup> Values in brackets show the statistics for the highest resolution shells.

<sup>b</sup> P/L/O indicate protein, ligand of interest and others (water and solvent molecules), respectively.

<sup>c</sup> rms indicates root-mean-square.



## HTRF-based PPAR $\gamma$ co-regulator recruitment and dimerization assays

**PPAR $\gamma$  co-regulator recruitment screen.** A homogeneous time-resolved fluorescence resonance energy transfer (HTRF) assay system was used to study the recruitment of co-regulatory peptides to the PPAR $\gamma$  LBD as described previously<sup>1</sup>. Biotinylated recombinant PPAR $\gamma$  LBD protein (expressed as described previously<sup>11</sup>) was stably coupled to terbium cryptate as streptavidin conjugate (Tb-SA; Cisbio Bioassays, Codolet, France) serving as FRET donor. Assay solutions were prepared in HTRF assay buffer (25 mM HEPES pH 7.5; 150 mM KF, 10% (w/v) glycerol) supplemented with 5 mM DTT and 0.1% (w/v) CHAPS and contained recombinant biotinylated PPAR $\gamma$  (final concentration 3 nM), Tb-SA (3 nM), the respective fluorescein-labeled co-regulator peptide (100 nM), and 1% DMSO with test compounds or DMSO alone as negative control. The co-regulator peptides fused to fluorescein as FRET acceptor were purchased from ThermoFisher Scientific (Life Technologies GmbH, Darmstadt, Germany). All experiments were performed in 384 well format using white flat bottom polystyrene microtiter plates (Greiner Bio-One, Frickenhausen, Germany). Each sample was tested in four technical replicates. After 2 hours incubation at room temperature, fluorescence intensity (FI) was measured at 520 nm for fluorescein acceptor fluorescence and at 620 nm for Tb-SA donor fluorescence on a SPARK plate reader (Tecan Deutschland GmbH) after excitation at 340 nm. FI<sub>520nm</sub> was divided by FI<sub>620nm</sub> and then multiplied by 10,000 to obtain a dimensionless HTRF signal. The following co-regulator peptides were used: steroid receptor co-activator (SRC) 1-1, Fluorescein-KY SQTSHKLVQLLTTTAEQQL-OH; SRC 1-2, Fluorescein-LTARHKILHRLQEGSPSD-OH; SRC 1-3, Fluorescein-ESKD HQLLRILLDKDEKDL-OH; SRC 1-4, Fluorescein-GPQTPQAQQKSLQQLLQTE-OH; SRC 2-1, Fluorescein-DSKGQTKLLQLLTTKSDQ M-OH; SRC 2-2, Fluorescein-LKEKHKILHRLQDSSSPV-OH; SRC 2-3, Fluorescein-KKKENALLRYLLDKDDTKD-OH; SRC 3-1, Fluorescein -ESKGGHKKLLQLLTCSSDDR-OH; SRC 3-2, Fluorescein-LQEKHRILHKLQNGNSPA-OH; SRC 3-3, Fluorescein-KKENALLRYLLDRDDPSD-OH; nuclear receptor co-repressor (NCOR) ID1, Fluorescein-RTHRLITLADHICQIITQDFARN-OH; NCOR ID2, Fluorescein- DPASNLGLEDIIRKALMGSFDDK-OH; silencing mediator for retinoid and thyroid hormone receptor (SMRT) ID1, Fluorescein-GHQRVVTLAQHISEVITQDYTRH-OH; SMRT ID2, Fluorescein -HASTNMGLEAIIRKALMGKYDQW-OH; CREB-binding protein 1 (CBP-1), Fluorescein-AASKHKQLSELLRGGSGSS-OH; C33, Fluorescein-HVEMHPLLMLMESQWGA-OH; D11-FXXLF, Fluorescein-VESGSSRFMQLFMANDLLT-OH; D22, Fluorescein- LPYEGSLLLKLLRAPVEEV-OH; EAB1, Fluorescein-SSNHQSSRLIELLSR-OH; EA2, Fluorescein-SSKGVLRMLAEPVSR-OH; androgen receptor-associated protein 70 (ARA70), Fluorescein-SRETSEKFKLLFQSYNVND-OH; N-terminal sequence of androgen receptor (AR N-term), Fluorescein-SKTYRGAFQNLQSVREVI-OH; peroxisome proliferator-activated receptor gamma co-activator 1-alpha (PGC1a), Fluorescein-EAEEPSLLKLLLAPANTQ-OH; nuclear receptor co-activator 6 (NCoA6, also termed PRIPRAP250), Fluorescein-VTLTSPLLVNLLQSDISAG-OH; nuclear receptor interacting protein 1 (NRIP1, also termed RIP140, interaction motif L6), Fluorescein-SHQKVTLQLLLGHKNEEN-OH; RIP140L8, Fluorescein-SFSKNGLLSRLLRQNQDSY-OH; TB3, Fluorescein-SSVASREWWVRELSR-OH; thyroid hormone receptor associated protein (TRAP) TRAP220/DRIP-1, Fluorescein-KVSQNPILTSLLQITGNGG-OH; TRAP220/DRIP-2, Fluorescein-NTKNHPMLMNLKDNPAQD-OH. For experiments involving covalent antagonist

GW9662, PPAR $\gamma$  (3 nM) in fully supplemented HTRF buffer was pre-incubated with 10  $\mu$ M GW9662 for 48 h at 4 °C in presence of 0.125% DMSO.

**Dose-dependent PPAR $\gamma$  co-regulator recruitment assays involving sGFP-labeled PPAR $\gamma$ .** Dose-dependent modulation of co-regulator recruitment as shown in Figure S7 was investigated in a different HTRF-based setup utilizing PPAR $\gamma$  LBD with N-terminal fusion to superfolder GFP (sGFP-PPAR $\gamma$ ; expressed as described previously<sup>11</sup>) with sGFP serving as the FRET acceptor. Peptides derived from CBP-1 coactivator motif 1 [CBP; biotin-NLVPDAASKHKQLSELLRGGSGS-OH], and SMRT interaction domain 2 [SMRT-ID2; biotin-SQAVQEHA STMNGLEAIIRKALMGKYDQW-OH] were purchased from Eurogentec (Seraing, Belgium) and coupled via streptavidin to Terbium cryptate. Assay solutions were prepared in 25 mM HEPES, pH 7.5, 150 mM KF, 5% (w/v) glycerol, 5 mM DTT, and 0.1% (w/v) CHAPS and contained Tb-SA (12 nM), the respective biotin-labeled peptide (12 nM), either 100 nM (for CBP) or 24 nM (for SMRT) sGFP-PPAR $\gamma$  protein, and 1% DMSO with test compounds or DMSO alone as negative control. Each sample was tested in three technical replicates. After 24 h incubation at RT, the fluorescence intensities (FI) at 520 nm and 620 nm were recorded and the HTRF determined as described above.

**PPAR $\gamma$ -RXR $\alpha$  heterodimer formation assay.** Influence of **2** on the formation of the PPAR $\gamma$ -RXR $\alpha$  heterodimer was investigated by titrating sGFP-RXR $\alpha$ -LBD (up to 300 nM, FRET acceptor) in presence of biotinylated PPAR $\gamma$  LBD<sup>11</sup> (0.375 nM), and Tb-SA (0.75 nM). The total sGFP content was kept constant at 300 nM by adding free sGFP. Assays were performed in HTRF assay buffer with 10% (w/v) glycerol supplemented with 5 mM DTT and 0.1% (w/v) CHAPS with 1% DMSO and test compounds at the indicated concentrations or DMSO alone as reference. Each sample was tested in three technical replicates. After 2 h incubation at RT, the fluorescence intensities (FI) at 520 nm and 620 nm were recorded and the HTRF determined as described above.

## Binding assays

**Differential Scanning Fluorimetry.** Thermal stability of the recombinant PPAR $\gamma$  LBD (prepared as described previously<sup>12</sup>) and stabilization by test compounds was studied by differential scanning fluorimetry on an Mx3005p real-time PCR instrument (Stratagene, San Diego, CA, USA) according to a published protocol<sup>13</sup>. Recombinant PPAR $\gamma$  LBD protein (final concentration 2  $\mu$ M) in buffer (10 mM HEPES pH 7.5; 100 mM NaCl) was mixed with SYPRO Orange dye (1:1000 dilution), DMSO (final concentration 5%) and test compounds (**2**, pioglitazone and mixtures at varying concentrations). Temperature was increased over 71 cycles (1 °C/cycle). All samples were tested in three independent experiments and control experiments without PPAR $\gamma$ -LBD were conducted to observe potential non-specific interactions between test compounds and the dye. The amplification plots were analyzed using a Boltzmann fit to obtain the melting points ( $T_m$ ) and to calculate  $\Delta T_m$  corresponding to  $T_m$  (compound) -  $T_m$  (untreated).

**Isothermal titration calorimetry.** ITC experiments were conducted on an Affinity ITC instrument (TA Instruments, New Castle, DE) at 25 °C with a stirring rate of 75 rpm. PPAR $\gamma$  LBD protein (20  $\mu$ M, prepared as described previously<sup>1</sup>) in buffer (20 mM Tris pH 7.5, 150 mM NaCl, 5% glycerol) containing 5% DMSO was titrated with the test compounds (100  $\mu$ M in the same buffer containing 5% DMSO) in 26 injections (1  $\times$  1

$\mu\text{L}$  and  $25 \times 5 \mu\text{L}$ ) with an injection interval of 150 s. To determine binding to the GW9662-bound PPAR $\gamma$  LBD, the protein (100  $\mu\text{M}$ ) was incubated at 4 °C for 24 h prior to the ITC experiment in the above described buffer supplemented with 250  $\mu\text{M}$  GW9662. ITC was then conducted as described above using buffer supplemented with 50  $\mu\text{M}$  GW9662. Binding of GW9662 was verified by titration of the GW9662-bound PPAR $\gamma$  LBD with pioglitazone under the same conditions which showed no heat of binding. As control experiments, the test compounds were titrated into the respective buffer, and the respective buffer was titrated to the PPAR $\gamma$  LBD proteins under otherwise identical conditions. The ITC results were analyzed using NanoAnalyze software (TA Instruments, New Castle, DE) with a sequential two-site binding model (1-PPAR $\gamma$ ) or an independent binding model (1-PPAR $\gamma$ /GW9662, 2-PPAR $\gamma$ , 2-PPAR $\gamma$ /GW9662).

**MS-based PPAR $\gamma$  ligand binding assay.** PPAR $\gamma$  LBD (at concentrations of 0.2  $\mu\text{M}$  or 1  $\mu\text{M}$ ) was incubated with ligands in Tris buffer (20 mM Tris, 200 mM NaCl, 0.5 mM TCEP, 5% (v/v) glycerol, 1% (v/v) DMSO, pH 7.5) in a total volume of 110  $\mu\text{L}$  for 1 h at 25 °C in a shaking water bath. In parallel, incubation was performed with previously denatured protein (80 °C, 30 min, water bath) under otherwise identical conditions. After transfer of 100  $\mu\text{L}$  of the binding samples to Microcon 10 kDa 0.5 mL centrifugal filters containing an Ultracel regenerated cellulose membrane (Merck, Darmstadt, Germany) ultrafiltration was performed at 14000 g for 40 min leading to a remaining volume of about 5  $\mu\text{L}$ . Next, each filter was put into another polypropylene tube and 10  $\mu\text{L}$  ammonium acetate buffer (154 mM, pH 7.4) was added on top of each filter before intense vortexing for 10 s. To separate the remaining residue on top of the membrane, the filter units were flipped over, so that the flow direction was opposite to the ultrafiltration step and centrifuged at 4000 g for 1 min. To the thus obtained samples, 80  $\mu\text{L}$  mobile phase (see below) were added. After centrifugation at 25142 g for 10 min, aliquots of each supernatant were supplemented with JP147 (compound 28 from ref<sup>4</sup>, final concentration 10 nM) as internal standard and diluted with mobile phase (see below). Quantification by LC-ESI-MS/MS was achieved using an API 3200 QTrap triple quadrupole mass spectrometer (Sciex, Darmstadt, Germany) coupled to an Agilent 1100 HPLC system (Agilent, Waldbronn, Germany) and a SIL-20A/HT autosampler (Shimadzu, Duisburg, Germany) controlled by the Analyst software (v.1.6.3) at an injection volume of 10  $\mu\text{L}$ . A Triart C18 column (3  $\mu\text{m}$ , 50 mm x 2 mm, YMC Europe, protected with a 0.5  $\mu\text{m}$  and a 0.2  $\mu\text{m}$  frit) was used as stationary phase and 0.1% HCOOH and H<sub>3</sub>CCN (40/60, v/v) as mobile phase at a flow rate of 400  $\mu\text{L}/\text{min}$ . MS detection was performed under positive ESI conditions in the MRM mode recording  $m/z$  416.1  $\rightarrow$  105.1 (2),  $m/z$  357.2  $\rightarrow$  134.1 (pioglitazone) and  $m/z$  382.2  $\rightarrow$  310.1 (JP147).

### Reporter gene assays

**Hybrid reporter gene assays.** Gal4-hybrid reporter gene assays were performed as described previously using the plasmids pFA-CMV-hTHR $\alpha$ -LBD<sup>12</sup>, pFA-CMV-hTHR $\beta$ -LBD<sup>12</sup>, pFA-CMV-hRAR $\alpha$ -LBD<sup>14</sup>, pFA-CMV-hRAR $\beta$ -LBD<sup>14</sup>, pFA-CMV-hRAR $\gamma$ -LBD<sup>14</sup>, pFA-CMV-hPPAR $\alpha$ -LBD<sup>15</sup>, pFA-CMV-hPPAR $\gamma$ -LBD<sup>15</sup>, pFA-CMV-hPPAR $\delta$ -LBD<sup>15</sup>, pFA-CMV-revERB $\alpha$ -LBD, pFA-CMV-hROR $\alpha$ -LBD<sup>16</sup>, pFA-CMV-hROR $\beta$ -LBD<sup>16</sup>, pFA-CMV-hROR $\gamma$ -LBD<sup>16</sup>, pFA-CMV-hLXR $\alpha$ -LBD<sup>17</sup>, pFA-CMV-hLXR $\beta$ -LBD<sup>17</sup>, pFA-CMV-hFXR-LBD<sup>18</sup>, pFA-CMV-hVDR-LBD<sup>14</sup>, pFA-CMV-hCAR-LBD<sup>14</sup>, pFA-CMV-hHNF4 $\alpha$ -

LBD<sup>19</sup>, pFA-CMV-hRXR $\alpha$ -LBD<sup>20</sup>, pFA-CMV-hRXR $\beta$ -LBD<sup>20</sup>, pFA-CMV-hRXR $\gamma$ -LBD<sup>20</sup>, pFA-CMV-hTR2-LBD<sup>21</sup>, pFA-CMV-hTR4-LBD<sup>21</sup>, pFA-CMV-hTLX-LBD<sup>21</sup>, pFA-CMV-hNur77-LBD<sup>22</sup>, pFA-CMV-hNurr1-LBD<sup>22</sup>, pFA-CMV-hNOR1-LBD<sup>22</sup>, and pFA-CMV-hLRH1-LBD encoding the hinge region and the ligand binding domain (LBD) of the canonical isoform of nuclear receptors. pFR-Luc (Stratagene) was used as reporter plasmid and pRL-SV40 (Promega) for normalization of transfection efficiency and cell growth. HEK293T cells (German Collection of Microorganisms and Cell Culture GmbH, DSMZ) were cultured in Dulbecco's modified Eagle's medium (DMEM), high glucose supplemented with 10% fetal calf serum (FCS), sodium pyruvate (1 mM), penicillin (100 U/mL), and streptomycin (100  $\mu$ g/mL) at 37 °C and 5% CO<sub>2</sub> and seeded in 96-well plates (3 $\times$ 10<sup>4</sup> cells/well). Medium was changed to Opti-MEM without supplements and cells were transiently transfected with one pFA-CMV-hNR-LBD clone, pFR-Luc and pRL-SV40 using Lipofectamine LTX reagent (Invitrogen) according to the manufacturer's instructions. Five hours after transfection, cells were incubated with the test compounds in Opti-MEM supplemented with penicillin (100 U/mL), streptomycin (100  $\mu$ g/mL) and 0.1% DMSO. Each sample was set up in duplicates and tested in at least three independent experiments. After 16 h incubation, luciferase activity was measured using the Dual-Glo Luciferase Assay System (Promega) according to the manufacturer's protocol on a Tecan Spark luminometer (Tecan Deutschland GmbH, Germany). Firefly luminescence was divided by Renilla luminescence and multiplied by 1000 resulting in relative light units (RLU) to normalize for transfection efficiency and cell growth. Fold activation was obtained by dividing the mean RLU of test compound by the mean RLU of the untreated control and relative activation was calculated by dividing the fold activation of a test sample by the fold activation of the respective reference agonist. The following reference ligands were used: THR $\alpha$ /THR $\beta$  – 1  $\mu$ M T3; RAR $\alpha$ /RAR $\beta$ /RAR $\gamma$  – 1  $\mu$ M tretinoin; PPAR $\alpha$  – 1  $\mu$ M GW7647; PPAR $\gamma$  – 1  $\mu$ M pioglitazone; PPAR $\delta$  – 1  $\mu$ M L165,041; ROR $\gamma$  – 1  $\mu$ M SR1001; ROR $\alpha$ /ROR $\beta$ /LXR $\alpha$ /LXR $\beta$  – 1  $\mu$ M T0901317; FXR – 1  $\mu$ M GW4064; VDR – 1  $\mu$ M calcitriol; CAR – 1  $\mu$ M CITCO; HNF4 $\alpha$  – 1  $\mu$ M compound 9<sup>19</sup>; RXR $\alpha$ /RXR $\beta$ /RXR $\gamma$  – 1  $\mu$ M bexarotene; TLX – 100  $\mu$ M propranolol; Nur77/Nurr1/NOR1 – 100  $\mu$ M amodiaquine. For dose-response curve fitting and calculation of EC<sub>50</sub> values, the equation “[Agonist] versus response (variable slope - four parameters)” was performed in GraphPad Prism (version 7.00, GraphPad Software, La Jolla, CA, USA).

**PPRE assay.** Activation of the PPAR response element (PPRE) was studied as described previously<sup>4</sup> using the reporter plasmid PPRE1-pGL3 encoding firefly luciferase under control of the human PPRE. pRL-SV40 was used for normalization of transfection efficiency and cell growth. HepG2 cells (DSMZ) were grown in DMEM high glucose supplemented with 10% FCS, sodium pyruvate (1 mM), penicillin (100 U/mL) and streptomycin (100  $\mu$ g/mL) at 37 °C and 5% CO<sub>2</sub>. 24 h before transfection, cells were seeded in 96-well plates (1.25 $\times$ 10<sup>4</sup> cells/well) pre-coated with Collagen G solution. Before transfection, the medium was replaced with Opti-MEM without additives. Transient transfection was performed using Lipofectamine 3000 reagent (Invitrogen) according to the manufacturer's protocol with PPRE1-pGL3 and pRL-SV40 (Promega). 5 h after transfection, cells were incubated with Opti-MEM supplemented with penicillin (100 U/mL) and streptomycin (100  $\mu$ g/mL) containing 0.1% DMSO and the respective test compound or 0.1% DMSO alone as an untreated control for 16 h. Each sample was tested in duplicate, and each experiment was repeated independently three times. Luciferase activity measurement and data analysis were performed as described for the hybrid reporter gene assays.

### PPAR $\gamma$ phosphorylation at Ser273

HEK293T cells were seeded in 6-well plates ( $3 \times 10^5$  cells/well) in DMEM high glucose, supplemented with sodium pyruvate (1 mM), penicillin (100 U/mL), streptomycin (100  $\mu$ g/mL) and 10% FCS at 37 °C and 5% CO<sub>2</sub>. After 24 h, cells were treated with rosiglitazone (1  $\mu$ M) or **2** (20  $\mu$ M) in Opti-MEM supplemented with penicillin (100 U/mL), streptomycin (100  $\mu$ g/mL) and 0.1% DMSO or with the supplemented medium alone. Each sample was prepared in three biologically independent repeats. After 16 h, cells were harvested, centrifuged at 1000 g for 10 min and frozen at -80 °C as dry pellets until further processing. For protein extraction, pellets were resuspended in 100  $\mu$ L complete radioimmunoprecipitation assay buffer (10 mL Pierce RIPA buffer supplemented with 1 tablet Pierce Protease and Phosphatase Inhibitor, ThermoFisher #A32959), thoroughly vortexed, and incubated at 4 °C and 600 rpm horizontal shaking for 15 min. After subsequent centrifugation at 14,000 g and 4 °C for 10 min, supernatants were harvested, mixed with 25  $\mu$ L 5X Pierce TM Lane Marker Reducing Sample Buffer (ThermoFisher #39000), and heated to 95 °C for 5 min. Samples were stored at -80 °C until further processing. Sodium dodecyl sulfate (SDS) polyacrylamide gel electrophoresis was conducted using a 12% polyacrylamide gel loaded with 15  $\mu$ L protein extract at 100 V for 20 min and 200 V for 40 min in running buffer (25 mM TRIS, 192 mM glycine, 0.1% w/v SDS, pH 8.3). Right before tank blotting of the separated protein to a methanol-activated polyvinylidene fluoride (PVDF) membrane (Immobilon®-FL PVDF-Membran, Merck, #05317), gel and membrane were equilibrated in transfer buffer (125 mM TRIS, 970 mM glycine) for 2 min. Tank blotting using transfer buffer drenched Whatmann-paper was conducted at 80 V and 4 °C over night. The PVDF membrane was washed 4 times for 10 min in Tris-buffered saline with 0.5% Tween 20 (TBST) and incubated in TBST with 5% BSA and either anti-PPAR $\gamma$  (Ser273) antibody (Bioss Antibodies #bs-4888R, diluted 1:1000), or anti-GAPDH (Cell Signaling Technology, clone D16H11, diluted 1:1000) over night at 4 °C, respectively. After repeating the washing step as described above, the membrane was incubated with horseradish peroxidase-conjugated secondary antibody (Sigma Aldrich #12-348, diluted 1:4000 in TBST and 5% skimmed milk) for 1 h at room temperature. After washing in TBST, the membrane was submerged in enhanced chemiluminescence solution (100 mM Tris/HCl pH 8.8, 2.5 mM luminol, 0.4 mM p-cumaric acid, 2.6 mM hydrogenperoxide) for 1 min and signal was detected using a ChemiDoc Imaging System (BioRad).

### Toxicity assay

COS-7 (DSMZ #ACC 60) cells were grown in DMEM high glucose, supplemented with 10% FCS, sodium pyruvate (1 mM), penicillin (100 U/mL), and streptomycin (100  $\mu$ g/mL) at 37 °C and 5% CO<sub>2</sub>. The day before the experiment, cells were seeded in 96-well plates ( $5 \times 10^4$  cells per well) in culture medium with reduced serum content (0.2%). The next day, medium was changed, maintaining the low serum content, and additionally containing 0.1% DMSO and the respective test compound or 0.1% DMSO alone as untreated control. After incubation for 24 h, the medium was aspirated, the wells were washed once with 100  $\mu$ L PBS, and incubated for 30 min with PBS containing either 1  $\mu$ M NucView® 405 fluorogenic caspase-3 substrate (#10405, Biotium, Fremont, USA) or 0.5  $\mu$ g/mL propidium iodide (#P4864, Merck, Darmstadt, Germany) to detect apoptosis and non-regulated forms of cell death, respectively. After incubation, a total of 6 fluorescence images per well at 10X magnification were taken

to detect NucView® (Ex: 381–400 nm, Em: 414–450 nm) and propidium iodide (Ex: 543–566 nm, Em: 580–611 nm), respectively, using on a Tecan Spark Cyto (Tecan Group AG). Reference readings for background correction and detection of auto-fluorescence were taken at the given wavelength prior to staining. Additionally, cell confluence was determined before test compound administration, after the first medium exchange, 24 h after test compound administration, and after fluorescence imaging using a Tecan Spark Cyto, to observe cell loss due to test compound administration and cell handling.

### Adipocyte-derived mesenchymal stem cell differentiation

**Cell culture and treatment:** Differentiation experiments of ASC52telo, hTERT cells (ATCC® SCRC-4000™) were conducted according to a previously described procedure<sup>23</sup>. In brief, cells were grown in DMEM high glucose, supplemented with 10% fetal calf serum, sodium pyruvate (1 mM), penicillin (100 U/mL), and streptomycin (100 µg/mL) at 37 °C and 5% CO<sub>2</sub>. Cells were seeded in standard culture medium at a density of 5,000 cells per well in 96-well plates. After adherence overnight, cells were incubated with differentiation medium, composed of standard culture medium supplemented with human insulin (10 µg/mL, #I3536, Merck KgaA, Darmstadt, Germany), dexamethasone (1 µM, #D4902, Merck KgaA, Darmstadt, Germany), isobutylmethylxanthine (0.5 mM, #I5879, Merck KgaA, Darmstadt, Germany), DMSO (final concentration 0.1%) and the respective test compounds. The differentiation medium was exchanged every 48-72 h for a total of six cycles in 13 days. The test compounds were supplemented freshly with every medium exchange. From day 14 until day 22 of culture, cells were kept in maintenance medium, composed of standard culture medium supplemented with human insulin (10 µg/mL) without additional treatment. The maintenance medium was exchanged every 48-72 h for a total of four cycles in nine days.

**Oil Red O staining:** After the 21-day differentiation procedure and test compound treatment, cells were washed with phosphate buffered saline (PBS) once and fixed with formalin (10%, stabilized with methanol, 100 µL per well, #15071, Morphisto GmbH, Offenbach am Main, Germany) for 15 min at room temperature. The fixing solution was aspirated, and the fixed cells were washed twice with 40% 2-propanol with the second wash step incubating for 30 min at room temperature to equilibrate the specimens for staining. Oil Red O (#O0625, Merck KgaA, Darmstadt, Germany) was prepared at 10 mg/mL in 2-propanol, filtered with grade 595 Whatman® filter paper (#311611, Schleicher & Schuell GmbH, London, UK) and a 0.2 µm syringe filter (FP 30/0,2 CA-S, #10462200, Schleicher & Schuell GmbH, London, UK), and diluted with ddH<sub>2</sub>O to a final concentration of 0.4% Oil Red O and 40% 2-propanol. Upon equilibration, specimens were incubated with 50 µL of 0.4% Oil Red O solution for 1 h at room temperature before the staining solution was aspirated and the wells were washed with ddH<sub>2</sub>O 2-3 times to remove precipitated Oil Red O crystals. Specimens were kept in ddH<sub>2</sub>O for subsequent analysis. For each well, multiple pictures were taken at a 4X magnification using a Motic®AE31E inverted microscope and a Moticom 1080 (Motic Hong Kong Ltd.). Images were dichromized and the red channel was extracted for analysis using ImageJ 1.53q. Percent Oil Red O-positive stained area was evaluated by generating binary pictures via application of a suitable threshold on the extracted pictures. The mean value of three technical replicates was calculated for

a single biological replicate. Each sample was tested in three biologically independent experiments (n=3).

### Differential gene expression analysis of hepatocytes

**Sample preparation.** HepG2 cells (DSMZ) were cultured in DMEM, high glucose supplemented with 10% fetal calf serum (FCS), sodium pyruvate (1 mM), penicillin (100 U/mL), and streptomycin (100 µg/mL) at 37 °C and 5% CO<sub>2</sub> and seeded in 6-well plates (1.0×10<sup>6</sup> cells/well). At 24 h after seeding, the medium was replaced with minimal essential medium (MEM) containing 1% charcoal-stripped FCS, penicillin (100 U/mL), and streptomycin (100 µg/mL). After 48 h, the medium was again exchanged for MEM with the same additives as before, additionally containing 0.1% DMSO and compound **2** (20 µM) or 0.1% DMSO alone as a control. Each treatment was performed in four biologically independent samples (n = 4). After an incubation period of 12 h, cells were harvested, washed twice with cold phosphate buffered saline (PBS), and used for RNA extraction with the E.Z.N.A.® Total RNA Kit I (R6834-02, Omega-Bio-Tek Inc., Norcross, GA, USA).

**Unbiased RNA sequencing and downstream analysis.** RNAseq was performed by Novogene (Cambridge, UK) on a fee-for-service basis. A total amount of 1 µg RNA per sample was used as input material for the RNA sample preparations. Sequencing libraries were generated using NEBNext® Ultra™ RNA Library Prep Kit for Illumina® (NEB, USA) following manufacturer's recommendations and index codes were added to attribute sequences to each sample. Briefly, mRNA was purified from total RNA using poly-T oligo-attached magnetic beads. Fragmentation was carried out using divalent cations under elevated temperature in NEBNext First Strand Synthesis Reaction Buffer (5X). First strand cDNA was synthesized using random hexamer primer and M-MuLV Reverse Transcriptase (RNase H). Second strand cDNA synthesis was subsequently performed using DNA Polymerase I and RNase H. Remaining overhangs were converted into blunt ends via exonuclease/polymerase activities. After adenylation of 3' ends of DNA fragments, NEBNext Adaptor with hairpin loop structure were ligated to prepare for hybridization. In order to select cDNA fragments of preferentially 150~200 bp in length, the library fragments were purified with AMPure XP system (Beckman Coulter, Beverly, USA). Then 3 µL USER Enzyme (NEB, USA) was used with size-selected, adaptor-ligated cDNA at 37 °C for 15 min followed by 5 min at 95 °C before PCR. Then PCR was performed with Phusion High-Fidelity DNA polymerase, Universal PCR primers and Index (X) Primer. At last, PCR products were purified (AMPure XP system) and library quality was assessed on the Agilent Bioanalyzer 2100 system. The clustering of the index-coded samples was performed on a cBot Cluster Generation System using PE Cluster Kit cBot-HS (Illumina) according to the manufacturer's instructions. After cluster generation, the library preparations were sequenced on an Illumina platform and paired-end reads were generated. Raw data (raw reads) of FASTQ format were firstly processed through fastp. In this step, clean data (clean reads) were obtained by removing reads containing adapter and poly-N sequences and reads with low quality from raw data. At the same time, Q20, Q30 and GC content of the clean data were calculated. All the downstream analyses were based on the clean data with high quality. Reference genome and gene model annotation files were downloaded from genome website browser (NCBI/UCSC/Ensembl) directly. Paired-end clean reads were aligned to the reference genome using the Spliced Transcripts Alignment to a Reference (STAR)



software, which is based on a previously undescribed RNA-seq alignment algorithm that uses sequential maximum mappable seed search in uncompressed suffix arrays followed by seed clustering and stitching procedure. FeatureCounts was used to count the read numbers mapped of each gene. Then, Reads Per Kilobase of exon model per Million mapped reads (RPKM) of each gene was calculated based on the length of the gene and reads count mapped to this gene. RPKM considers the effect of sequencing depth and gene length for the reads count at the same time and is used for estimating gene expression levels<sup>24</sup>. Differential expression analysis between the two conditions/groups (four biological replicates per condition) was performed using DESeq2 R package which provides statistical routines for determining differential expression in digital gene expression data using a model based on the negative binomial distribution. Genes with an p-value < 0.05 found by DESeq2 were assigned as differentially expressed. Gene Ontology (GO, <http://www.geneontology.org/>), which is a major bioinformatics classification system to unify the presentation of gene properties and enrichment analysis of differentially expressed genes was implemented by the clusterProfiler, AnnotationDbi, and org.Hs.eg.db R package. GO terms with p-value < 0.05 were considered significantly enriched by differentially expressed genes. The pathview R package on the KEGG pathway project database (<http://www.genome.jp/kegg/>) was used to visualize pathways regulated (log<sub>2</sub> fold change) by different treatments, irrespective of the p-value associated with each gene. The PPARgene database<sup>2</sup> was used to analyze genes regulated by **2**, pioglitazone or GA for the presence of experimentally confirmed or predicted PPAR response elements (results in Table S2).

### Observation of FoxO phosphorylation and activity

**Cell culture.** HepG2 cells (DSMZ) were cultured in DMEM, high glucose supplemented with 10% fetal calf serum (FCS), sodium pyruvate (1 mM), penicillin (100 U/mL), and streptomycin (100 µg/mL) at 37 °C and 5% CO<sub>2</sub>. One passage prior to and during experiments, cells were kept on plates coated with collagen G. For coating, culture plates were incubated at 37 °C with a 10 µg/mL solution of collagen G in PBS for 30 min right before cell seeding.

**FoxO response element reporter assay.** HepG2 cells were seeded in collagen G coated 96-well plates (3 x 10<sup>4</sup> cells/well) in DMEM high glucose, supplemented with sodium pyruvate (1 mM), penicillin (100 U/mL) and streptomycin (100 µg/mL). After 24 h, medium was changed to MEM supplemented with penicillin (100 U/mL) and streptomycin (100 µg/mL). After further 24 h, medium was changed to Opti-MEM without supplements and cells were transiently transfected with FHRE-Luc (Addgene plasmid #1789, 12 ng/well) and pRL-SV40 (Promega, 1 ng/well) using Lipofectamine 3000 (Invitrogen). Four hours after transfection, cells were incubated with the test compounds in MEM supplemented with penicillin (100 U/mL), streptomycin (100 µg/mL) and 0.1% DMSO or the supplemented medium alone. At various time-points after incubation, luciferase activity was measured using the Dual-Glo Luciferase Assay System (Promega) according to the manufacturer's protocol on a Tecan Spark luminometer (Tecan Deutschland GmbH, Germany). Each sample was set up in duplicates and tested in at least three independent experiments. Firefly luminescence was divided by Renilla luminescence and multiplied by 1000 resulting in relative light units (RLU) to normalize for transfection efficiency and cell growth. Relative FHRE

activity was obtained by dividing the mean RLU of treatment samples by the mean RLU of the 0.1% DMSO control.

**Protein extraction, SDS-PAGE, and Western blot.** HEK293T cells were seeded in 6-well plates ( $3 \times 10^5$  cells/well) in DMEM high glucose, supplemented with sodium pyruvate (1 mM), penicillin (100 U/mL), streptomycin (100  $\mu\text{g/mL}$ ) and 10% FCS at 37 °C and 5% CO<sub>2</sub>. After 24 h, cells were treated with **2** (20  $\mu\text{M}$ ) in Opti-MEM supplemented with penicillin (100 U/mL), streptomycin (100  $\mu\text{g/mL}$ ) and 0.1% DMSO or with the supplemented medium alone. Each sample was prepared in three biologically independent repeats. After 16 h, cells were harvested, centrifuged at 1000 g for 10 min and frozen at -80 °C as dry pellets until further processing. For protein extraction, pellets were resuspended in 100  $\mu\text{L}$  complete radioimmunoprecipitation assay buffer (10 mL Pierce RIPA buffer supplemented with 1 tablet Pierce Protease and Phosphatase Inhibitor, ThermoFisher #A32959), thoroughly vortexed, and incubated at 4 °C and 600 rpm horizontal shaking for 15 min. After subsequent centrifugation at 14,000 g and 4 °C for 10 min, supernatants were harvested, mixed with 25  $\mu\text{L}$  5X Pierce TM Lane Marker Reducing Sample Buffer (ThermoFisher #39000), and heated to 95 °C for 5 min. Samples were stored at -80 °C until further processing. Sodium dodecyl sulfate (SDS) polyacrylamide gel electrophoresis was conducted using a 12% polyacrylamide gel loaded with 15  $\mu\text{L}$  protein extract at 100 V for 20 min and 200 V for 40 min in running buffer (25 mM TRIS, 192 mM glycine, 0.1% w/v SDS, pH 8.3). Right before tank blotting of the separated protein to a methanol-activated polyvinylidene fluoride (PVDF) membrane (Immobilon®-FL PVDF-Membran, Merck, #05317), gel and membrane were equilibrated in transfer buffer (125 mM TRIS, 970 mM glycine) for 2 min. Tank blotting using transfer buffer drenched Whattmann-paper was conducted at 80 V and 4 °C over night. The PVDF membrane was washed 4 times for 10 min in Tris-buffered saline with 0.5% Tween 20 (TBST) and incubated in TBST with 5% BSA and either anti-phospho-FoxO3a (Ser253) antibody (Cell Signaling Technology #9466, diluted 1:1000), or anti-GAPDH (Cell Signaling Technology, clone D16H11, diluted 1:1000) over night at 4 °C, respectively. After repeating the washing step as described above, the membrane was incubated with horseradish peroxidase-conjugated secondary antibody (Sigma Aldrich #12-348, diluted 1:4000 in TBST and 5% skimmed milk) for 1 h at room temperature. After washing in TBST, the membrane was submerged in enhanced chemiluminescence solution (100 mM Tris/HCl pH 8.8, 2.5 mM luminol, 0.4 mM p-cumaric acid, 2.6 mM hydrogenperoxide) for 1 min and signal was detected using a ChemiDoc Imaging System (BioRad).

### Molecular docking

Molecular docking was performed in Molecular Operating Environment (MOE, version 2020.09, Chemical Computing Group Inc. Montreal, QC, Canada). The X-ray structure of the PPAR $\gamma$ -1 complex (pdb ID: 8aty) served as template for structure- and docking-based design of **2**. The structure was prepared using the MOE QuickPrep tool with default settings, adjusting the protonation state of the complex. **2** was prepared using the MOE Wash tool with dominant protonation state at pH 7.0; coordinates were rebuilt 3D; existing chirality was maintained. The following settings were used for all docking calculations: Force Field = Amber10:EHT, Receptor = Receptor and Solvent Atoms, Site = Ligand Atoms of **1**, Placement = Template with 100 poses, Refinement = Rigid Receptor, scoring function = GBVI/WSA dG with 10 poses. Redocking of the

crystallized ligand **1** in the orthosteric site (RMSD = 0.39, mean RMSD = 1.57, Score = -8.24) and the alternative site (RMSD = 0.18, mean RMSD = 1.92, Score = -8.67) of PPAR $\gamma$  confirmed suitability of the method. Potential simultaneous binding of **2** and pioglitazone was evaluated by docking pioglitazone to the PPAR $\gamma$ -**2** complex (pdb ID: 8atz). Preparations and docking were performed as described above. However, As no ligand is bound to the orthosteric site of the PPAR $\gamma$ -**2** complex, the thiazolidinedione interactions of pioglitazone with His323, His449 and Ser289 were used as template and the alternative site ligand was used to define excluded volumes. Comparison with the PPAR $\gamma$ -pioglitazone complex 5y2o revealed an RMSD of 3.57 for the experimentally determined binding mode of pioglitazone and the predicted pose in the PPAR $\gamma$ -**2** complex.

# NMR and HPLC data of 1

## <sup>1</sup>H NMR

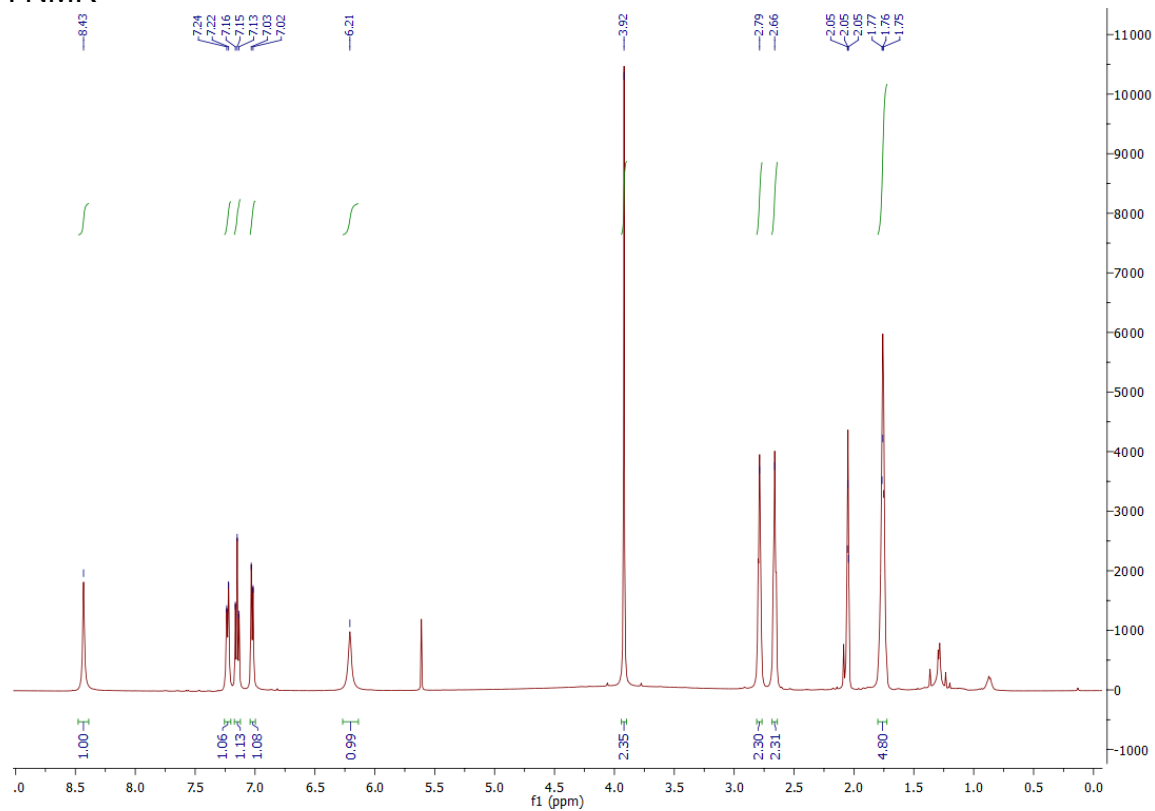

## <sup>13</sup>C NMR

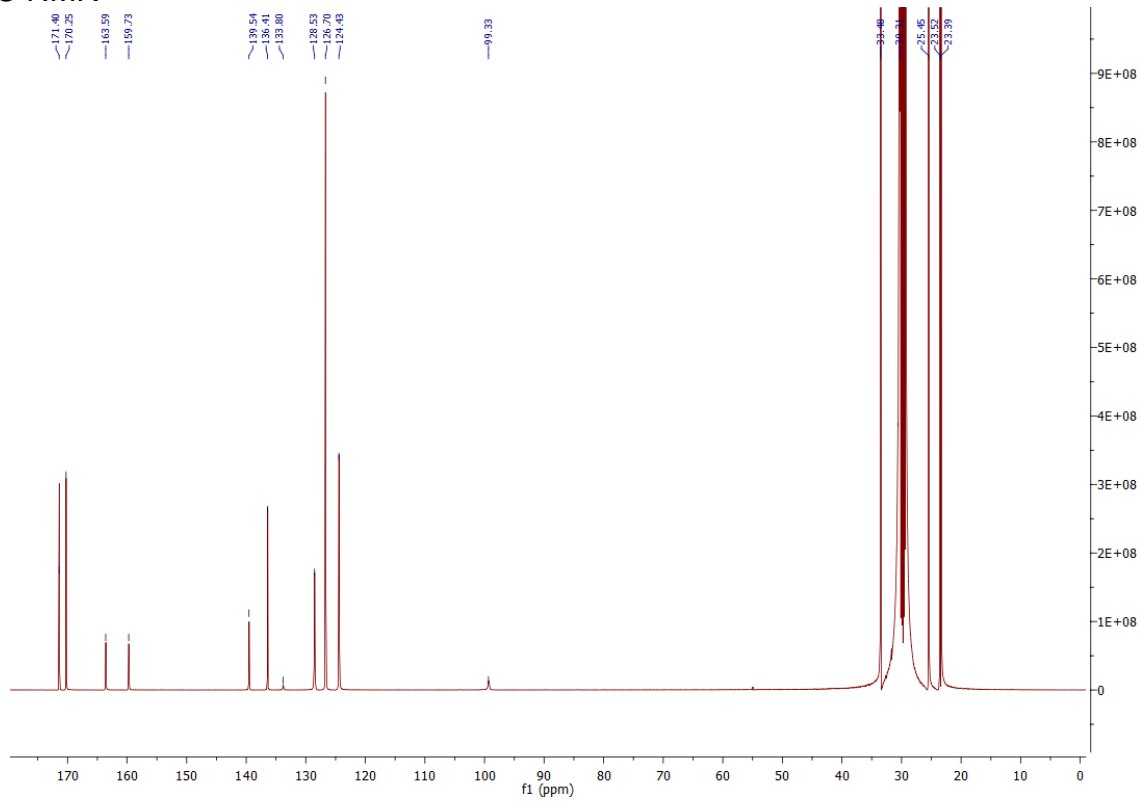

HPLC

Chrom Type: Fixed WL Chromatogram, 254 nm

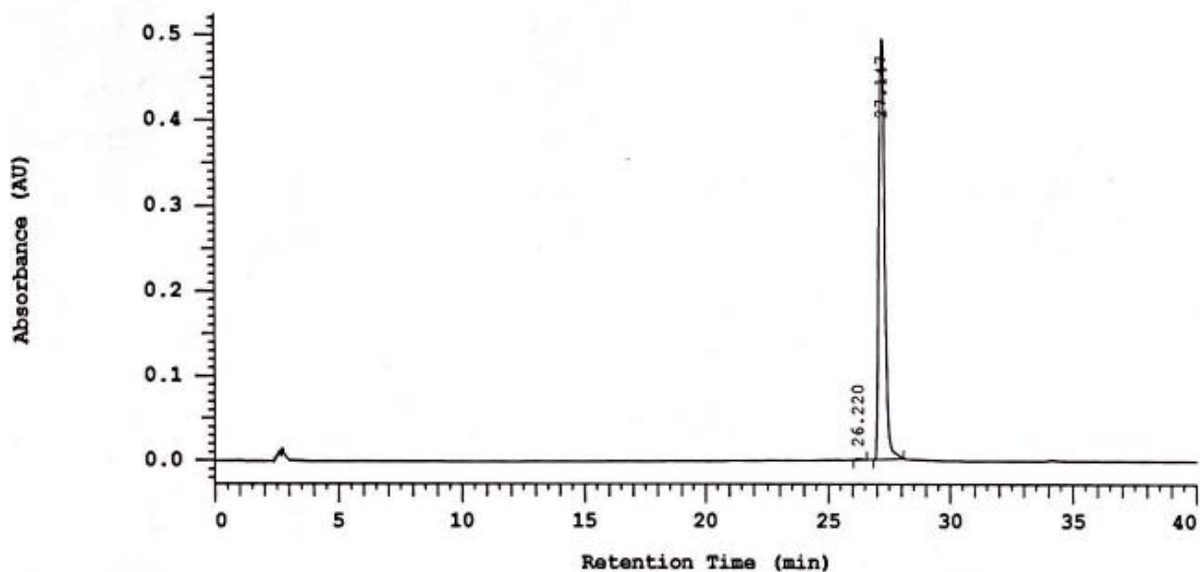

| No. | RT     | Area    | Area %  | Height |
|-----|--------|---------|---------|--------|
| 1   | 26.220 | 12067   | 0.295   | 793    |
| 2   | 27.147 | 4073318 | 99.705  | 248285 |
|     |        | 4085385 | 100.000 | 249078 |

Chrom Type: Fixed WL Chromatogram, 280 nm

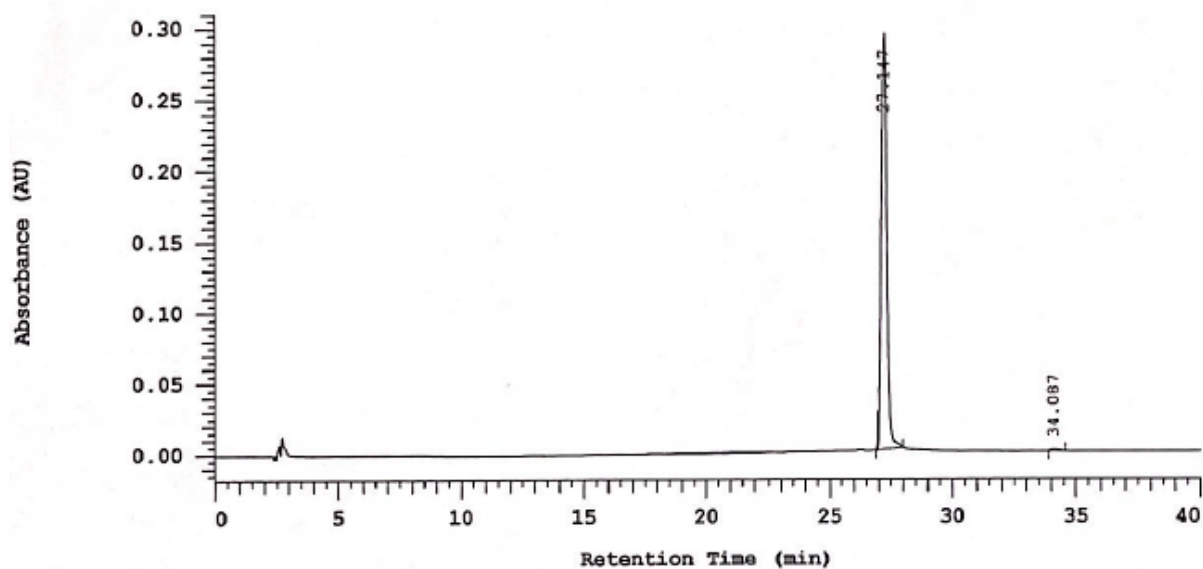

| No. | RT     | Area    | Area %  | Height |
|-----|--------|---------|---------|--------|
| 1   | 27.147 | 2382575 | 99.426  | 146340 |
| 2   | 34.087 | 13753   | 0.574   | 606    |
|     |        | 2396328 | 100.000 | 146946 |

## NMR and HPLC data of 2

### <sup>1</sup>H NMR

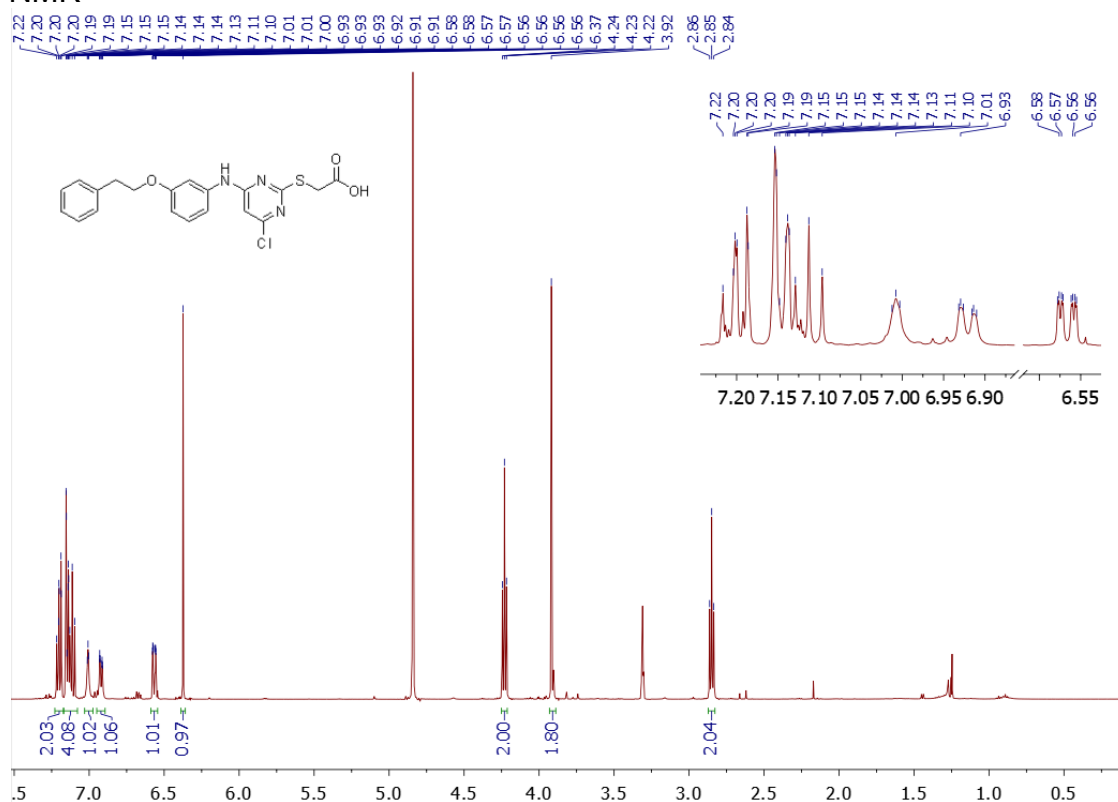

### <sup>13</sup>C NMR

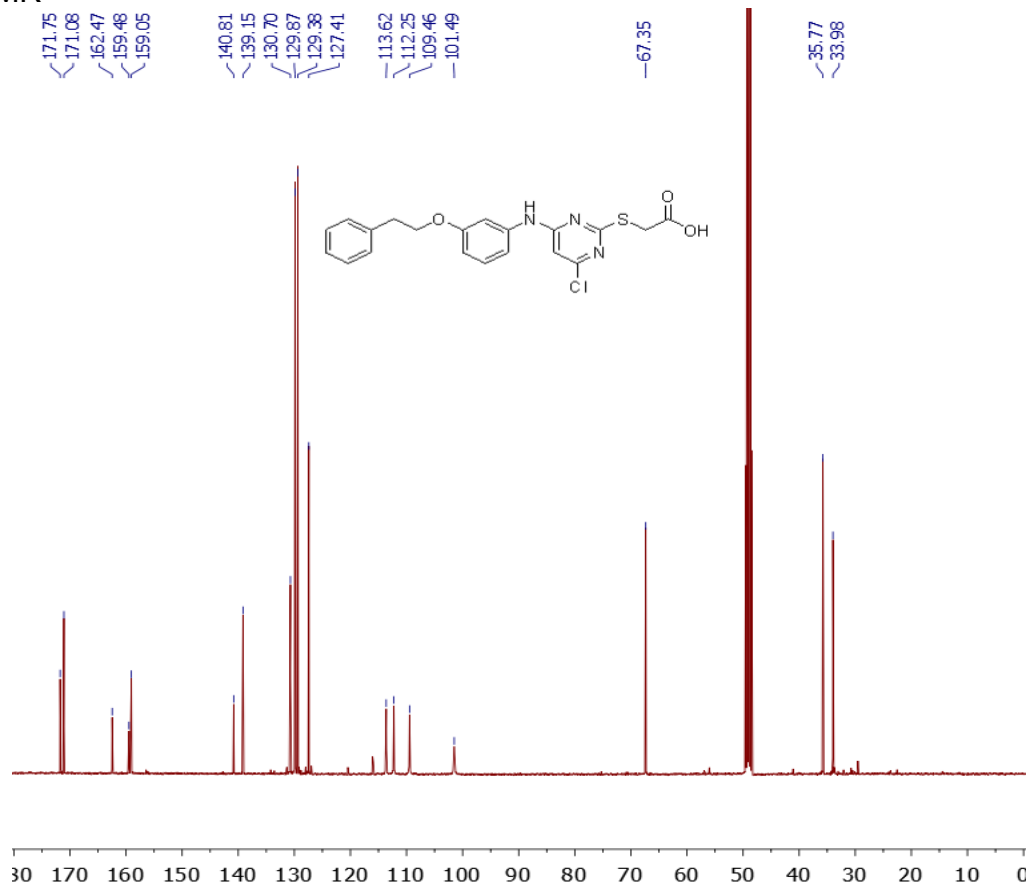

HPLC

Chrom Type: Fixed WL Chromatogram, 254 nm

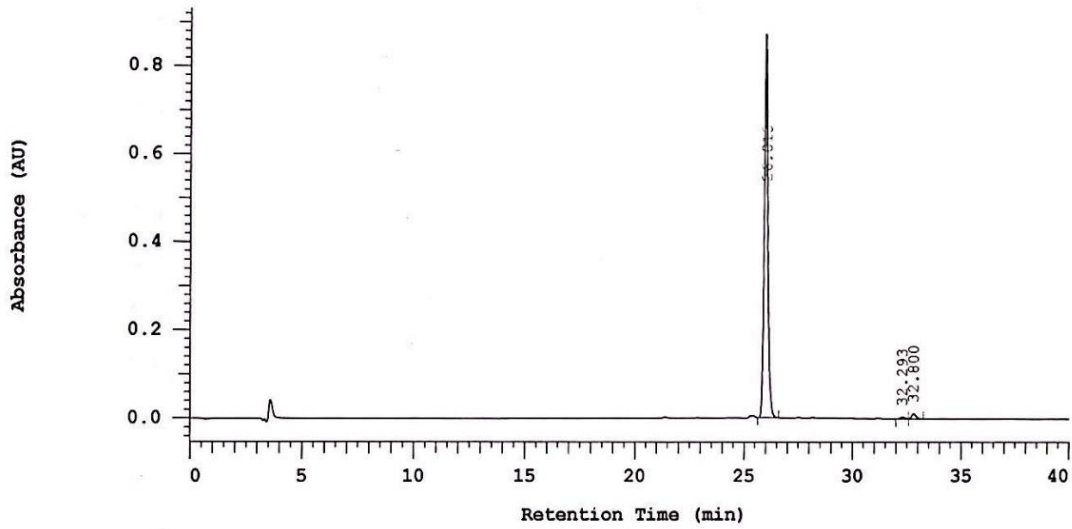

Pump 1: 5160

Pump 1 Solvent A: MeOH

Pump 1 Solvent B: Wasser

Pump 1 Solvent C: MeOH

Pump 1 Solvent D: MeOH

| No. | RT     | Area    | Area %  | Height |
|-----|--------|---------|---------|--------|
| 1   | 26.013 | 4875848 | 97.697  | 258304 |
| 2   | 32.293 | 30556   | 0.612   | 2272   |
| 3   | 32.800 | 84378   | 1.691   | 6117   |
|     |        | 4990782 | 100.000 | 266693 |

Chrom Type: Fixed WL Chromatogram, 280 nm

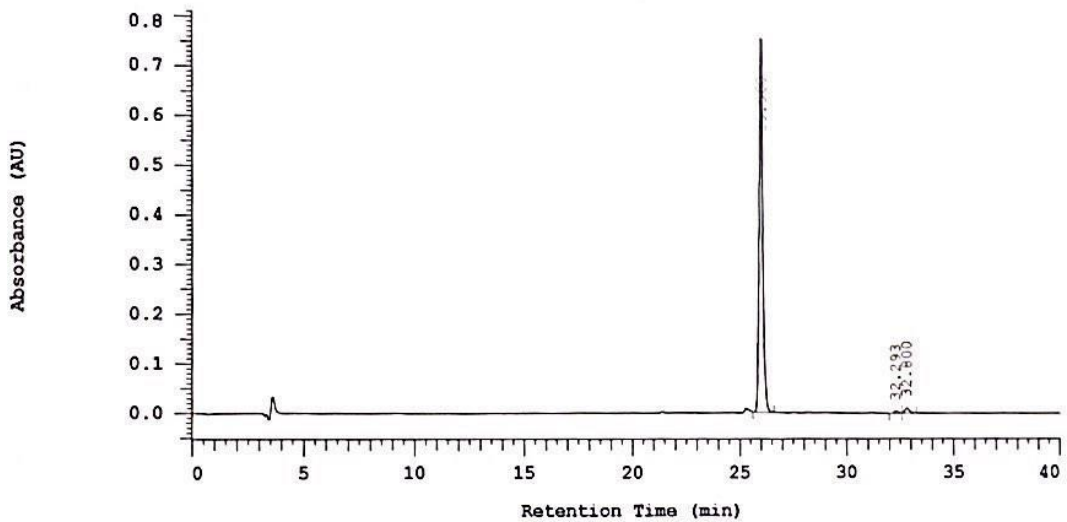

Pump 1: 5160

Pump 1 Solvent A: MeOH

Pump 1 Solvent B: Wasser

Pump 1 Solvent C: MeOH

Pump 1 Solvent D: MeOH

| No. | RT     | Area    | Area %  | Height |
|-----|--------|---------|---------|--------|
| 1   | 25.960 | 4238963 | 97.648  | 360334 |
| 2   | 32.293 | 27021   | 0.622   | 1985   |
| 3   | 32.800 | 75073   | 1.729   | 5418   |
|     |        | 4341057 | 100.000 | 367737 |

**Western Blots**  
(representative)

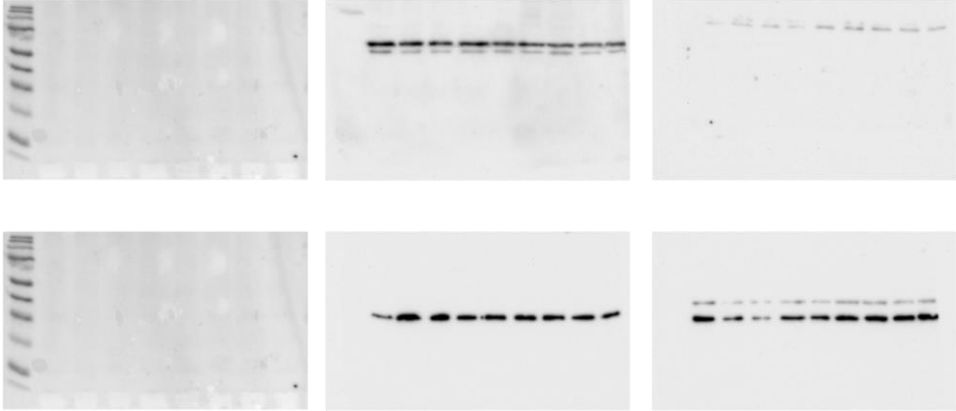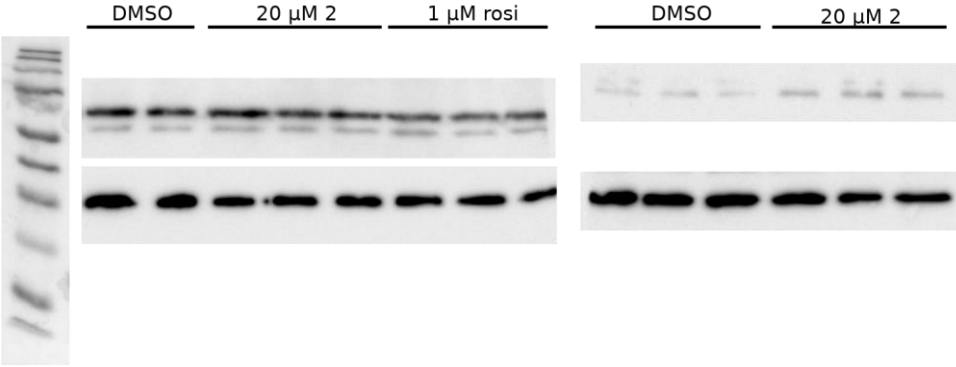



## Supplementary References

- (1) Willems, S.; Gellrich, L.; Chaikuad, A.; Kluge, S.; Werz, O.; Heering, J.; Knapp, S.; Lorkowski, S.; Schubert-Zsilavecz, M.; Merk, D. Endogenous Vitamin E Metabolites Mediate Allosteric PPAR $\gamma$  Activation with Unprecedented Co-Regulatory Interactions. *Cell Chem. Biol.* **2021**, *28* (10), 1489-1500.e8.
- (2) Fang, L.; Zhang, M.; Li, Y.; Liu, Y.; Cui, Q.; Wang, N. PPARgene: A Database of Experimentally Verified and Computationally Predicted PPAR Target Genes. *PPAR Res.* **2016**, 6042162.
- (3) Santilli, A. A.; Scotese, A. C.; Tomarelli, R. M. A Potent Antihypercholesterolemic Agent: [4-Chloro-6-(2,3-Xylidino)-2-Pyrimidinylthio]Acetic Acid (Wy-14643). *Experientia* **1974**, *30* (10), 1110–1111.
- (4) Pollinger, J.; Gellrich, L.; Schierle, S.; Kilu, W.; Schmidt, J.; Kalinowsky, L.; Ohrndorf, J.; Kaiser, A.; Heering, J.; Proschak, E.; Merk, D. Tuning Nuclear Receptor Selectivity of Wy14,643 towards Selective Retinoid X Receptor Modulation. *J. Med. Chem.* **2019**, *62* (4), 2112–2126.
- (5) Kabsch, W. Processing of X-Ray Snapshots from Crystals in Random Orientations. *Acta Crystallogr. Sect. D Biol. Crystallogr.* **2014**, *70* (8), 2204–2216.
- (6) Evans, P. R.; Murshudov, G. N. How Good Are My Data and What Is the Resolution? *Acta Crystallogr. D. Biol. Crystallogr.* **2013**, *69* (Pt 7), 1204–1214.
- (7) Sliwiak, J.; Jaskolski, M.; Dauter, Z.; McCoy, A. J.; Read, R. J. Likelihood-Based Molecular-Replacement Solution for a Highly Pathological Crystal with Tetartohedral Twinning and Sevenfold Translational Noncrystallographic Symmetry. *Acta Crystallogr. Sect. D Biol. Crystallogr.* **2014**, *70* (2), 471–480.
- (8) Gellrich, L.; Heitel, P.; Heering, J.; Kilu, W.; Pollinger, J.; Goebel, T.; Kahnt, A.; Arifi, S.; Pogoda, W.; Paulke, A.; Steinhilber, D.; Proschak, E.; Wurglics, M.; Schubert-Zsilavecz, M.; Chaikuad, A.; Knapp, S.; Bischoff, I.; Fürst, R.; Merk, D. L-Thyroxin and the Nonclassical Thyroid Hormone TETRAC Are Potent Activators of PPAR $\gamma$ . *J. Med. Chem.* **2020**, *63* (13), 6727–6740.
- (9) Casañal, A.; Lohkamp, B.; Emsley, P. Current Developments in Coot for Macromolecular Model Building of Electron Cryo-Microscopy and Crystallographic Data. *Protein Sci.* **2020**, *29* (4), 1069–1078.
- (10) Kovalevskiy, O.; Nicholls, R. A.; Long, F.; Carlon, A.; Murshudov, G. N. Overview of Refinement Procedures within REFMAC 5: Utilizing Data from Different Sources. *Acta Crystallogr. Sect. D Struct. Biol.* **2018**, *74* (Pt 3), 215–227.
- (11) Kilu, W.; Merk, D.; Steinhilber, D.; Proschak, E.; Heering, J. Heterodimer Formation with Retinoic Acid Receptor RXR $\alpha$  Modulates Coactivator Recruitment by Peroxisome Proliferator-Activated Receptor PPAR $\gamma$ . *J. Biol. Chem.* **2021**, *297* (1), 100814.
- (12) Gellrich, L.; Heitel, P.; Heering, J.; Kilu, W.; Pollinger, J.; Goebel, T.; Kahnt, A.; Arifi, S.; Pogoda, W.; Paulke, A.; Steinhilber, D.; Proschak, E.; Wurglics, M.; Schubert-Zsilavecz, M.; Chaikuad, A.; Knapp, S.; Bischoff, I.; Fürst, R.; Merk, D. L-Thyroxin and the Nonclassical Thyroid Hormone TETRAC Are Potent Activators of PPAR $\gamma$ . *J. Med. Chem.* **2020**, *63* (13), 6727–6740.
- (13) Niesen, F. H.; Berglund, H.; Vedadi, M. The Use of Differential Scanning Fluorimetry to Detect Ligand Interactions That Promote Protein Stability. *Nat. Protoc.* **2007**, *2* (9), 2212–2221.
- (14) Flesch, D.; Cheung, S.-Y.; Schmidt, J.; Gabler, M.; Heitel, P.; Kramer, J. S.; Kaiser, A.; Hartmann, M.; Lindner, M.; Lüddens-Dämgen, K.; Heering, J.;

- Lamers, C.; Lüddens, H.; Wurglics, M.; Proschak, E.; Schubert-Zsilavecz, M.; Merk, D. Non-Acidic Farnesoid X Receptor Modulators. *J. Med. Chem.* **2017**, *60* (16), 7199–7205.
- (15) Rau, O.; Wurglics, M.; Paulke, A.; Zitzkowski, J.; Meindl, N.; Bock, A.; Dingermann, T.; Abdel-Tawab, M.; Schubert-Zsilavecz, M. Carnosic Acid and Carnosol, Phenolic Diterpene Compounds of the Labiate Herbs Rosemary and Sage, Are Activators of the Human Peroxisome Proliferator-Activated Receptor Gamma. *Planta Med.* **2006**, *72* (10), 881–887.
- (16) Moret, M.; Helmstädter, M.; Grisoni, F.; Schneider, G.; Merk, D. Beam Search for Automated Design and Scoring of Novel ROR Ligands with Machine Intelligence\*\*. *Angew. Chemie - Int. Ed.* **2021**, *60* (35), 19477–19482.
- (17) Heitel, P.; Achenbach, J.; Moser, D.; Proschak, E.; Merk, D. DrugBank Screening Revealed Alitretinoin and Bexarotene as Liver X Receptor Modulators. *Bioorg. Med. Chem. Lett.* **2017**, *27* (5), 1193–1198.
- (18) Schmidt, J.; Klingler, F.-M.; Proschak, E.; Steinhilber, D.; Schubert-Zsilavecz, M.; Merk, D. NSAIDs Ibuprofen, Indometacin, and Diclofenac Do Not Interact with Farnesoid X Receptor. *Sci. Rep.* **2015**, *5*, 14782.
- (19) Meijer, I.; Willems, S.; Ni, X.; Heering, J.; Chaikuad, A.; Merk, D. Chemical Starting Matter for HNF4 $\alpha$  Ligand Discovery and Chemogenomics. *Int. J. Mol. Sci.* **2020**, *21*, 7895.
- (20) Heitel, P.; Gellrich, L.; Kalinowsky, L.; Heering, J.; Kaiser, A.; Ohrndorf, J.; Proschak, E.; Merk, D. Computer-Assisted Discovery and Structural Optimization of a Novel Retinoid X Receptor Agonist Chemotype. *ACS Med. Chem. Lett.* **2019**, *10* (2), 203–208.
- (21) Faudone, G.; Zhubi, R.; Celik, F.; Knapp, S.; Chaikuad, A.; Heering, J.; Merk, D. Design of a Potent TLX Agonist by Rational Fragment Fusion. *J. Med. Chem.* **2022**, *65* (3), 2288–2296.
- (22) Willems, S.; Kilu, W.; Ni, X.; Chaikuad, A.; Knapp, S.; Heering, J.; Merk, D. The Orphan Nuclear Receptor Nurr1 Is Responsive to Non-Steroidal Anti-Inflammatory Drugs. *Commun. Chem.* **2020**, *3*, 85.
- (23) Wolbank, S.; Stadler, G.; Peterbauer, A.; Gillich, A.; Karbiener, M.; Streubel, B.; Wieser, M.; Katinger, H.; Van Griensven, M.; Redl, H.; Gabriel, C.; Grillari, J.; Grillari-Voglauer, R. Telomerase Immortalized Human Amnion- and Adipose-Derived Mesenchymal Stem Cells: Maintenance of Differentiation and Immunomodulatory Characteristics. *Tissue Eng. Part A* **2009**, *15* (7), 1843–1854.
- (24) Mortazavi, A.; Williams, B. A.; McCue, K.; Schaeffer, L.; Wold, B. Mapping and Quantifying Mammalian Transcriptomes by RNA-Seq. *Nat. Methods* **2008**, *5* (7), 621–628.
